1 **Spatiotemporal dynamics and modelling support the case for area-wide management of**  
2 **citrus greasy spot in a Brazilian smallholder farming region**

3 F.F. Laranjeira<sup>a\*</sup>, S.X.B. Silva<sup>b</sup>, R.E. Murray-Watson<sup>c</sup>, A.C.F. Soares<sup>d</sup>, H.P.Santos-Filho<sup>a</sup>,  
4 N.J. Cunniffe<sup>c</sup>

5 <sup>a</sup>Embrapa Cassava & Fruits, CP 007, Cruz das Almas, Bahia, Brazil, CEP 44380-000.

6 <sup>b</sup>Agência Estadual de Defesa Agropecuária da Bahia (ADAB), Salvador, Bahia, Brazil.

7 <sup>c</sup>Department of Plant Sciences, University of Cambridge, Downing Street, Cambridge, UK CB2 3EA.

8 <sup>d</sup>Núcleo de Estudos em Microbiologia Aplicada, Universidade Federal do Recôncavo da Bahia (UFRB), Cruz  
9 das Almas, Brazil.

10 \*E-mail address: [francisco.laranjeira@embrapa.br](mailto:francisco.laranjeira@embrapa.br)

11 Running head: Citrus greasy spot in Brazil

12

13 Keywords: *Citrus sinensis*, *Zasmidium citri*, primary and secondary infection, disease epidemiology,  
14 mathematical model, meta-population model.

15

16 **Abstract**

17 Citrus greasy spot (CGS), caused by *Zasmidium citri*, induces premature defoliation and yield  
18 loss in *Citrus* spp. CGS epidemiology is well understood in areas of high humidity such as  
19 Florida (USA), but remains unaddressed in Brazil, despite differing climatic conditions and  
20 disease management practices. We characterize the spatiotemporal dynamics of CGS in the  
21 Recôncavo of Bahia, Brazil, focusing on four hierarchical levels (quadrant, plant, grove and  
22 region). A survey conducted in 19 municipalities showed that disease is found throughout the  
23 entire region with a prevalence (i.e. proportion of affected sampling units) of 100% in groves  
24 and plants, and never lower than 70% on leaves. Index of dispersion ( $D$ ) values suggest the  
25 spatial pattern of symptomatic units lies somewhere between random and regular. This was  
26 confirmed by the parameters of the binary power law for plants and their quadrants ( $\log(A) < 0$   
27 and  $b < 1$ ). Variability in disease severity at different plant heights (0.7 m, 1.3 m and 2.0 m)  
28 was tested, but no consistent differences were observed. We introduce a simple  
29 compartmental model synthesising the epidemiology of the disease, in order to motivate and  
30 guide further research. The data we have collected allow such a model to be parameterised,  
31 albeit with some ambiguity over the proportion of new infections that result from inoculum  
32 produced within the grove vs. external sources of infection. By extending our model to  
33 include two populations of growers – those who control and those who do not – coupled by  
34 the spread of airborne inoculum, we investigate likely performance of the type of cultural  
35 controls that would be accessible to citrus growers in Northeastern Brazil. Our model shows  
36 that control via removal of the key source of inoculum – i.e. fallen leaves – can be very  
37 effective. However, successful control is likely to require area-wide strategies, in which a  
38 large proportion of growers actively manage disease.

39

40

## 41 Introduction

42 Citrus greasy spot (*Zasmidium citri* Whiteside), CGS, is considered an important  
43 fungal disease in areas of high relative air humidity and temperature (Mondal and Timmer,  
44 2006; Silva *et al.*, 2015; Timmer & Gottwald, 2000; Whiteside, 1988), such as the Caribbean  
45 basin and Florida in the USA. The main symptom is irregular leaf spots resembling a  
46 brownish-black grease, surrounded by a greenish-yellow halo which is more conspicuous in  
47 the disease's initial stages (Hidalgo *et al.*, 1997). Dark spots – which are leaf symptoms rather  
48 than perithecia – are visible on the abaxial side of the leaf and usually correspond to chlorotic  
49 areas on the adaxial side. The former increase in size whereas the latter fade away (Timmer &  
50 Gottwald, 2000; Whiteside, 1988). *Z. citri* also infects fruits causing unsightly rind  
51 blemishing which can affect trade value (Timmer & Gottwald, 2000). Perithecia are produced  
52 only in fallen decomposing leaves (Timmer *et al.*, 2000). CGS leads to premature defoliation  
53 followed by reduction of both fruit size and plant vigour (Timmer *et al.*, 2000). At least in  
54 Cuba, associated loss of yield can reach 5 t/ha (Diaz *et al.*, 1985).

55 Despite its importance in many citrus producing regions (Timmer *et al.*, 2000), CGS is  
56 considered to be only a minor disease in Brazil. Few studies characterizing its epidemiology  
57 in the Brazilian context have therefore been performed (Laranjeira *et al.*, 2005). However,  
58 CGS is important in Bahia State, the second most important citrus growing region in Brazil.  
59 A regional survey in Bahia showed that the disease occurs at high prevalence (100% of the  
60 sampled groves) meaning CGS is endemic, in the sense of being regularly found and very  
61 common in the area (Silva *et al.*, 2009). Moreover, CGS has been shown to exert a severe  
62 defoliating effect on cultivated citrus in Bahia, with one study estimating that 500 leaves are  
63 lost due to the disease per year from each infected “Pera” sweet orange plant (Silva *et al.*,  
64 2015). Surprisingly, however, our discussions with citrus growers in Bahia reveal they do not  
65 perceive CGS to be a yield-limiting factor, and recent reports indicate that less than 4% of  
66 growers try to manage the disease (Rodrigues, 2018).

67 Studies based on the spatiotemporal patterns of the disease may help to better  
68 understand the pathogen's dispersion mechanism(s) and to develop additional strategies for  
69 disease management. In particular, understanding spatial patterns of disease offers the  
70 promise of understanding the balance between auto- and allo-infection at the grove scale, and  
71 in turn of revealing the extent to which disease control must be attempted on an area-wide  
72 basis. The association of the life-cycle with weather is well studied (Garcia *et al.*, 1980;  
73 Hidalgo *et al.*, 1997; Mondal & Timmer, 2003a) but there are no reports regarding spatial  
74 patterns.

75 In Cuba, rain and relative air humidity are correlated with CGS incidence. The disease  
76 builds up between summer and early autumn, when the most intense rains occur and the  
77 relative humidity increases to between 84% and 90% (Garcia *et al.*, 1980). In Costa Rica  
78 ascospore release closely follows seasonal rain patterns. The number of trapped ascospores  
79 quickly rises in May, peaking at the beginning of June (late spring). This is then followed by  
80 considerable decline in July and the number of released ascospores remains low for the rest of  
81 the year (Hidalgo *et al.*, 1997). In Florida in the USA the pseudothecia grow slowly on the  
82 decomposing litter during the relatively dry spring, and ascospore release is retarded until the

83 summer rains, with symptoms following only in the winter (Timmer *et al.*, 2000). In  
84 Northeastern Brazil (Bahia), however, the weather conditions are conducive for inoculum  
85 production in all seasons. The relative humidity is always higher than 70% and rain events  
86 occur throughout the year (Silva *et al.*, 2015).

87 Despite the amount of information generated, no study has attempted to construct a  
88 mathematical model of CGS. In this paper, we develop a model of *Z. citri* population  
89 dynamics which we use to compare the likely efficacy of disease management strategies. In  
90 Florida and other regions with an extensive citrus-production industry, cultivation tends to be  
91 based around large commercial operations, within which *Z. citri* is controlled by fungicides  
92 (Mondal & Timmer, 2006a). However, small-holder growers are in the majority in Bahia, and  
93 such growers do not have ready access to expensive agrochemicals, or even to the machinery  
94 required to apply such products. We therefore concentrate here on the performance of a  
95 cultural control of the type that could potentially be performed by resource-poor growers. We  
96 focus in particular on removal of fallen leaf litter, a management strategy originally proposed  
97 by Whiteside (1970) nearly 50 years ago. Such a localised cultural control done by an  
98 individual grower can clearly only affect the component of the epidemic spread driven by  
99 within-grove production of inoculum. We therefore particularly focus on using our model to  
100 assess whether and under which conditions the performance of cultural disease management  
101 can be improved when it is taken up area-wide by a significant fraction of a community of  
102 growers (Bassanezi *et al.*, 2013; Bergamin Filho *et al.*, 2016; Sherman *et al.*, 2019).

103

## 104 **Materials and Methods**

### 105 *Levels of the spatial hierarchy and sampling procedures*

106 We divided our sample space into four levels: plant quadrants (Hierarchical Level 1,  
107 HL1), plants in a grove (HL2), groves (HL3) and the region (HL4). A plant quadrant was  
108 considered as each side of a plant, i.e. there were two within-row quadrants and two across-  
109 rows quadrants. A grove was defined as a uniform production unit inside a farm; groves we  
110 considered ranged in size from 1 Ha to 3 Ha. Plants in a single grove invariably had the same  
111 rootstock and scion varieties, as well as the same age (which varied between three and six  
112 years over the set of groves we considered) and planting practice (i.e. spacing within and  
113 across rows).

114 To guide decisions about logistics and methods used at the other spatial levels, CGS  
115 prevalence (fraction of disease cases in a sample of a given region) and incidence (fraction of  
116 affected plants in a given orchard) were first quantified in our HL4, the 'Recôncavo da Bahia'  
117 region (an area formed of 20 municipalities in the vicinity of Todos os Santos Bay on the East  
118 coast of Brazil near the city of Salvador; see also Fig. 1). As a first criterion, only the 19  
119 municipalities with at least 100 ha of citrus groves were sampled (IBGE, 2017): Cachoeira  
120 (38° 56' 56"W , 12° 35' 26"S), Cabaceiras do Paraguaçu (39° 11' 12"W, 12° 37' 50"S), Castro  
121 Alves (39° 14' 45"W, 12° 41' 32"S), Conceição da Feira (38° 58' 31"W, 12° 30' 49"S),

122 Conceição do Almeida (39° 10' 50"W, 12° 48' 03"S), Cruz das Almas (39° 08' 35"W, 12° 40'  
123 59"S), Dom Macedo Costa (39° 12' 23"W, 12° 53' 06"S), Governador Mangabeira (39° 02'  
124 33"W, 12° 35' 34"S), Jaguaripe (39° 10' 14"W, 13° 11' 41"S), Maragogipe (39° 02' 29"W, 12°  
125 45' 04"S), Muniz Ferreira (39° 06' 44"W, 12° 59' 50"S), Muritiba (39° 09' 44"W, 12° 37'  
126 09"S), Sapeaçu (39° 11' 32"W, 12° 38' 28"S), São Félix (39° 02' 33"W, 12° 42' 22"S), Santo  
127 Amaro da Purificação (38° 50' 54"W, 12° 32' 27"S), São Felipe (39° 02' 50"W, 12° 44' 00"S),  
128 Santo Antônio de Jesus (39° 18' 51"W, 12° 58' 34"S), São Miguel das Matas (39° 27' 58"W,  
129 12° 58' 45"S) and Varzedo (39° 20' 44"W, 12° 58' 40"S). One grove per municipality was  
130 sampled; each was no larger than 3 Ha, and consisted of 'Pera' sweet orange grafted on  
131 Rangpur lime. The choices of evaluation method, number of groves per municipality, citrus  
132 variety and grove size were based on CGS sampling procedures previously recommended for  
133 the Recôncavo Baiano region (Silva *et al.*, 2009). In each grove a 'W'-shaped path was  
134 followed in which 30 plants were arbitrarily chosen and thoroughly visually evaluated for the  
135 presence of typical CGS symptoms. CGS prevalence in the region was then calculated as the  
136 proportion of groves with affected plants, whereas incidence was estimated as the proportion  
137 of symptomatic plants in each grove.

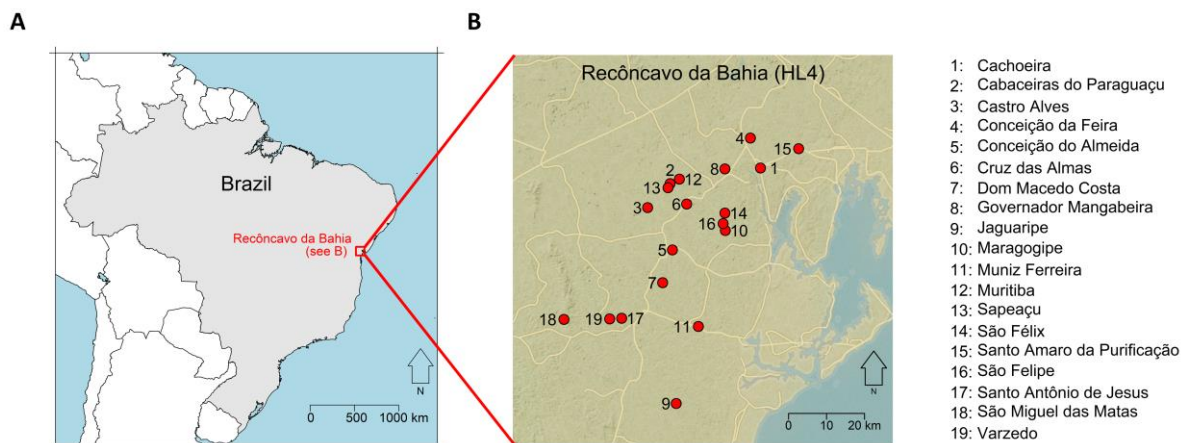

138  
139 **Figure 1. Locations in Recôncavo of Bahia (our Hierarchical Level 4) that were sampled for disease. Only**  
140 **the 19 (of the 20) municipalities in the region with at least 100 ha of citrus groves were sampled. (A)**  
141 **Location of the region in Brazil. (B) The 19 locations which were sampled. The maps were produced using**  
142 **the R packages maps (Becker *et al.*, 2018) and OpenStreetMap (Fellows, 2019).**

143  
144 Data thus collected were the basis for examining the spatiotemporal patterns in HL1,  
145 HL2 and HL3. Ten groves of 'Pêra' sweet orange grafted on Rangpur lime (ranging from six  
146 to ten years old) were selected in three separate subregions of the Cruz das Almas  
147 municipality. Following a 'W'-shaped path, 30 plants were inspected in each grove. The  
148 number of inspected plants in each leg of the path was chosen according to the grove's shape  
149 and size. The position of each plant in each leg of the path was chosen before starting the  
150 procedure in each grove. The first five mature leaves from five different branches were  
151 examined in each plant's quadrant (two within planting rows and two between rows) in search  
152 of typical symptoms. The proportions of symptomatic leaves, quadrants and leaves were then

153 calculated. The evaluations began in August 2006 and were performed monthly until February  
154 2008.

155

### 156 *Temporal patterns*

157 Monthly mean incidence (proportion of symptomatic plants, quadrants or leaves) was  
158 calculated by averaging data from the ten sampled groves and used to plot disease progress  
159 curves.

160

### 161 *Weather data and distributed lag analysis*

162 The following variables were recorded daily by the Embrapa Cassava & Tropical  
163 Fruits weather station, 10 km east of the three evaluated groves: average rain (mm); days of  
164 rain each month; minimum, mean and maximum air temperature (°C) and mean air relative  
165 humidity (%). Data were organized in a monthly set and a distributed lag analysis was  
166 performed against *psl* (i.e. the proportion of symptomatic leaves) considering time lags of up  
167 6 months. Distributed lag analysis is a regression used to predict current values of a dependent  
168 variable based on both the current value of an explanatory variable and the lagged (past  
169 period) values of that same variable (Laranjeira *et al.*, 2003; Chatfield, 2004; Paul *et al.*,  
170 2007).

171

### 172 *Spatial pattern and dynamics*

173 To examine relations between the distinct levels of our spatial hierarchy, HL1 (among  
174 quadrants of a plant), HL2 (plants of a grove) and HL3 (groves in the region), the index of  
175 dispersion ( $D$ ) and the Binary Power Law were used (Madden & Hughes, 1995). The  
176 sampling units ( $N$ ) were respectively the plant quadrants (HL1), the plants (HL2) and the  
177 groves (HL3); and the potential diseased entities ( $n$ ) were leaves (HL1 and HL2) and plants  
178 (HL3). The hierarchical levels had the following combinations of  $N$ ,  $n$ : 1200, 5 (HL1); 300,  
179 20 (HL2); 10, 30 (HL3).

180 The observed variance ( $V_{\text{obs}}$ ) as well as the expected binomial variance ( $V_{\text{bin}}$ ) were  
181 calculated for each hierarchical level and evaluation date (Madden & Hughes, 1995; Madden,  
182 Hughes & Vandenbosch, 2007), in order to obtain the index of dispersion ( $D = V_{\text{obs}} / V_{\text{bin}}$ ). A  
183  $\chi^2$  test was used to assess whether there was any departure from randomness. The index of  
184 dispersion is used to assess the spatial pattern of a single hierarchical level on a given  
185 evaluation date. Values of  $D$  higher than 1 were considered indicators of aggregation of  
186 symptomatic plants, those lower than 1 were taken to reflect a regular pattern. Those values  
187 which did not statistically differ from 1 were an indication of randomness, that is, a  
188 distribution of symptomatic plants without any regularity or aggregation.

189 The Binary Power Law, an adapted form of the Taylor Power Law for proportional  
190 data where variances do not increase monotonically with means (Madden *et al.*, 2018), was  
191 used to assess the spatial heterogeneity of disease incidence. If the disease incidence was

192 found to be aggregated (indicated by a slope,  $b$ ,  $< 1$ ), this would favour the hypothesis that  
193 auto-infection was an important driver of CGS incidence in groves. However, if the disease  
194 incidence was uniform ( $b > 1$ ), this would suggest that allo-infection contributed more to  
195 CGS incidence.

196 Whilst the index of dispersion considers individual datasets, the Binary Power Law  
197 (BPL) can be used to assess multiple data sets (Madden *et al.*, 2018). The BPL uses observed  
198 variance and expected binomial variance to estimate the spatial heterogeneity of CGS.

$$199 \quad \log(V_{obs}) = \log(A) + b \log(V_{bin})$$

200 A suitable  $F$  test was used to determine the significance of the relations between  $\log(V_{bin})$  and  
201  $\log(V_{obs})$  (Statistica 5.0, Tulsa, USA); goodness-of-fit was assessed via  $R^2$  and an analysis of  
202 residual patterns *vs.* the expected values of  $\log(V_{bin})$  (Madden & Hughes, 1995); Residual  
203 normality was also tested (Looney & Gullledge, 1985). The parameters corresponding to the  
204 intercept ( $\log(A)$ ) and the regression slope ( $b$ ) were considered significant if different from 0  
205 and 1, respectively (t test,  $p < 0.05$ ) (Madden & Hughes, 1995). The binary power law is used  
206 to assess the spatial pattern of a collection of evaluation dates in a given hierarchical level. A  
207 value  $b > 1$  was taken as an indication of underdispersion, whereas  $b < 1$  indicated  
208 overdispersion and  $b = 1$  randomness.

209

### 210 *Vertical pattern*

211 The variability in the proportion of symptomatic leaves ( $psl$ ) among plant heights was  
212 evaluated in three randomly selected groves in July 2007 (these three groves were not part of  
213 the set of groves used to assess spatial patterns). Leaves at three heights, 0.7 m; 1.3 m and 2.0  
214 m (treatments) were sampled in each of 30 plants (replications) per grove (block) in a total of  
215 270 sampling units. For each of these units, 20 leaves were evaluated and the number of  
216 infected leaves was scored. These data were analysed using a generalized linear mixed model  
217 for binomial counts via the R package `lme4` (Bates *et al.*, 2015), taking the grove as a (fixed)  
218 blocking factor, height as a (fixed) treatment effect and plant as a random effect. Significance  
219 was assessed by comparing nested models via Likelihood Ratio tests (Lewis, Butler &  
220 Gilbert, 2011).

221

### 222 *Mathematical model*

223 We develop a simple compartmental model of the epidemiology of *Z. citri*, focusing  
224 on only the key features relevant to CGS epidemiology in Brazil (Fig. 2). Our core “single-  
225 grower” model tracks the disease status of individual leaves on a representative plant within a  
226 single grove, since this is the scale at which disease symptoms are expressed and at which  
227 symptoms were scored in the survey. However, since the disease status of individual plants  
228 sets the grove-scale dynamics, our model produces results of relevance to our Hierarchical

229 Level 3 (i.e. an individual grove). The single-grower model is then extended to allow for area-  
 230 wide control (see Area-wide disease management, below), by accounting for disease spread  
 231 within two coupled populations of growers, those who control disease and those who do not.

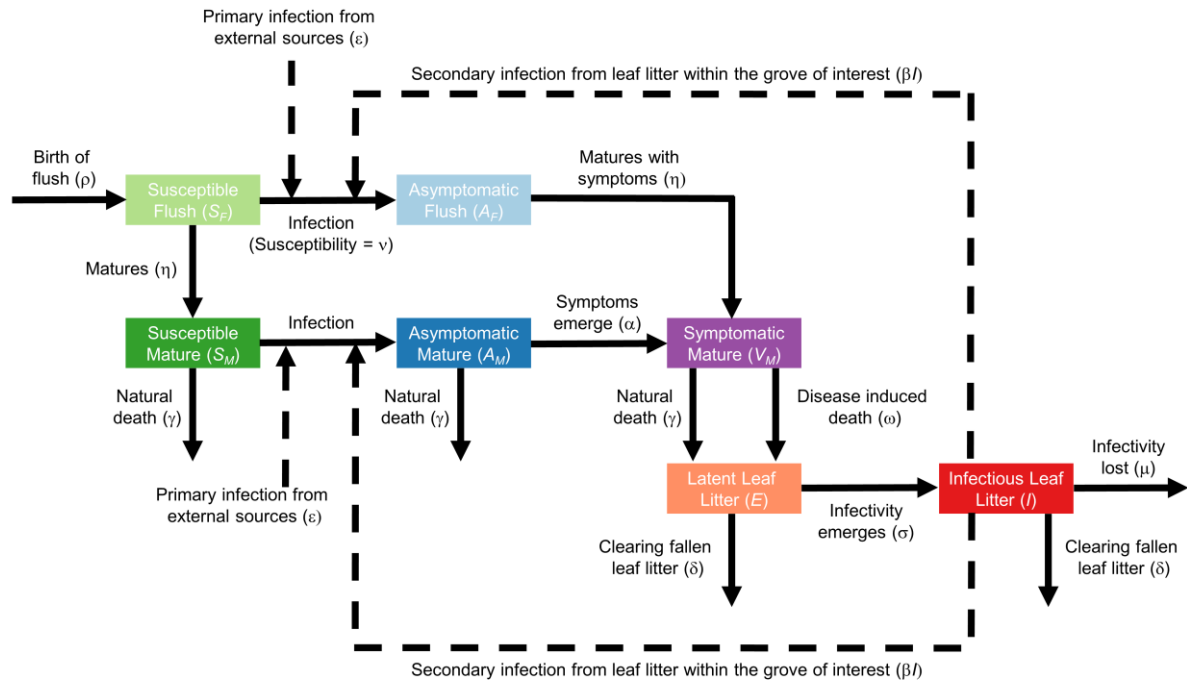

232

233 **Figure 2. Schematic showing the structure of the single-grower mathematical model for within- and**  
 234 **between-grove spread of citrus greasy spot.**

235

236 We separate newly-created flush leaves from mature leaves in our model, since we  
 237 scored only mature leaves for disease symptoms. We assume that flush transitions to maturity  
 238 after an average of  $1/\eta$  units of time, where  $\eta$  is the rate of maturation. We also assume that  
 239 infected leaves do not show symptoms immediately, with the incubation period of mature  
 240 leaves assumed to average  $1/\alpha$  units of time, where  $\alpha$  is the rate of development of symptoms.  
 241 We furthermore assume that only mature leaves can exhibit symptoms, with infected flush  
 242 leaves starting to show symptoms immediately after reaching maturity (Fig. 2, Table 1).

243 A total of five leaf classes are therefore tracked: susceptible (i.e. healthy) flush ( $S_F$ ),  
 244 asymptomatic infected flush ( $A_F$ ), susceptible mature leaves ( $S_M$ ), asymptomatic infected  
 245 mature leaves ( $A_M$ ) and symptomatic mature leaves ( $V_M$ ). Since only mature leaves were  
 246 scored for disease, the proportion of symptomatic leaves ( $psl$ ) as recorded in the survey data  
 247 corresponds to  $\Gamma = V_M/(S_M+A_M+V_M)$ . Mature leaves are assumed to abscise and fall to the  
 248 ground at rate  $\gamma$ ; symptomatic infected leaves are assumed to suffer additional disease-  
 249 induced mortality at rate  $\omega$  (Mondal & Timmer, 2006a). This continual turnover of infected

250 and uninfected leaves is offset by production of new flush; for simplicity we assume  
 251 production occurs at constant rate  $\rho$  (Laranjeira *et al.*, 2003)

252

| Symbol        | Meaning                                                        | Value                                                         | Source                                                                      |
|---------------|----------------------------------------------------------------|---------------------------------------------------------------|-----------------------------------------------------------------------------|
| $S_F$         | Number of susceptible (healthy) flush leaves                   | Varies                                                        | n/a                                                                         |
| $A_F$         | Number of infected (asymptomatic) flush leaves                 | Varies                                                        | n/a                                                                         |
| $S_M$         | Number of susceptible (healthy) mature leaves                  | Varies                                                        | n/a                                                                         |
| $A_M$         | Number of infected (asymptomatic) mature leaves                | Varies                                                        | n/a                                                                         |
| $V_M$         | Number of infected (symptomatic) flush leaves                  | Varies                                                        | n/a                                                                         |
| $E$           | Number of infected fallen leaves that are not yet sporulating  | Varies                                                        | n/a                                                                         |
| $I$           | Number of infected fallen leaves that have started sporulating | Varies                                                        | n/a                                                                         |
| $t$           | Time (in months)                                               | Varies                                                        | n/a                                                                         |
| $\rho$        | Birth rate of flush                                            | 6000 month <sup>-1</sup>                                      | Turrell (1961)                                                              |
| $\beta$       | Rate of secondary infection from infected fallen leaves        | Fitted to data                                                | See Fig. 9                                                                  |
| $\varepsilon$ | Rate of primary infection from outside focal grove             | Fitted to data                                                | See Fig. 9                                                                  |
| $\nu$         | Proportionate susceptibility of flush vs. mature               | 1                                                             | Mondal & Timmer (2003b)                                                     |
| $\eta$        | Rate of maturation of flush to become mature                   | 1/3 month <sup>-1</sup>                                       | Spiegel-Roy & Goldschmidt (1996)                                            |
| $\gamma$      | Rate of death of mature leaves                                 | 1/9 month <sup>-1</sup>                                       | Wallace A, Zidan ZI, Mueller RT (1954)<br>Spiegel-Roy & Goldschmidt, (1996) |
| $\alpha$      | Rate of emergence of symptoms                                  | 1/2 month <sup>-1</sup>                                       | Mondal & Timmer (2006b)                                                     |
| $\omega$      | Rate of disease-induced death                                  | 2/9 month <sup>-1</sup>                                       | Timmer <i>et al.</i> (2000)                                                 |
| $\sigma$      | Rate of emergence of infectivity on infected fallen leaves     | 1/2 month <sup>-1</sup>                                       | Mondal & Timmer (2006b)                                                     |
| $\mu$         | Rate of loss of infectivity on fallen leaves                   | 1 month <sup>-1</sup>                                         | Mondal & Timmer (2003b)                                                     |
| $\delta$      | Rate at which leaf litter is cleared                           | 0 month <sup>-1</sup><br>(scanned over in assessing controls) | Litter clearance is not common practice in Brazil                           |

253 **Table 1. Meaning of symbols and parameters, as well as default parameter values, in the mathematical**  
 254 **model of disease experienced by a single-grower (Fig. 1). Sources are given for model parameters (see also**  
 255 **Results).**

256



257 Secondary infection within the grove of interest occurs at rate  $\beta$  via sporulation off of  
 258 fallen leaf litter that was once an infected mature leaf (Mondal & Timmer, 2006b; Mondal *et*  
 259 *al.*, 2003; Timmer *et al.*, 2000); this follows a latent period on the ground which averages  
 260  $1/\sigma$  units of time. Tracking this within-grove secondary infection pathway requires us to track  
 261 a further two classes of leaf litter: latently infected ( $E$ ) and sporulating infectious ( $I$ ). The only  
 262 source of latently infected leaves is mature symptomatic (i.e. leaves in class  $V_M$ ) abscising  
 263 from the tree; i.e. any pre-symptomatic infected leaves that abscise are assumed to not lead to  
 264 infectious litter, and there is no spread of the pathogen within the litter (Fig. 2, Table 1).

265 We assume that sporulating litter remains infectious for an average of  $1/\mu$  units of  
 266 time, and that litter is potentially cleared by the grower at rate  $\delta$ . We also allow for primary  
 267 infection from sources of inoculum outside the grove of interest. In our single-grower model  
 268 we assume this occurs at a constant rate ( $\epsilon$ ). We allow the susceptibility of flush to differ from  
 269 that of mature leaves: the proportionate susceptibility of flush is assumed to be  $\nu$  (with an  
 270 equal effect on susceptibility to infection via both the primary and the secondary infection  
 271 pathways) (Fig. 2, Table 1).

272 The system of equations defining the single-grower model is therefore as follows.

$$\begin{aligned}\frac{dS_F}{dt} &= [\text{Production}] - [\text{Primary Infection}] - [\text{Secondary Infection}] - [\text{Maturation}], \\ &= \rho - \epsilon\nu S_F - \beta\nu S_F I - \eta S_F,\end{aligned}$$

$$\begin{aligned}\frac{dA_F}{dt} &= [\text{Primary infection}] + [\text{Secondary infection}] - [\text{Maturation with symptoms}], \\ &= \epsilon\nu S_F + \beta\nu S_F I - \eta A_F,\end{aligned}$$

$$\begin{aligned}\frac{dS_M}{dt} &= [\text{Maturation}] - [\text{Primary infection}] - [\text{Secondary infection}] - [\text{Natural death}], \\ &= \eta S_F - \epsilon S_M - \beta S_M I - \gamma S_M,\end{aligned}$$

$$\begin{aligned}\frac{dA_M}{dt} &= [\text{Primary infection}] + [\text{Secondary infection}] - [\text{Natural death}] - [\text{Emergence of symptoms}], \\ &= \epsilon S_M + \beta S_M I - \gamma A_M - \alpha A_M,\end{aligned}$$

$$\begin{aligned}\frac{dV_M}{dt} &= [\text{Emergence of symptoms}] - [\text{Natural death}] - [\text{Disease induced death}], \\ &= (\alpha A_M + \eta A_F) - \gamma V_M - \omega V_M,\end{aligned}$$

$$\begin{aligned}\frac{dE}{dt} &= [\text{Litter fall from symptomatic infected}] - [\text{Emergence of infectivity}] - [\text{Litter clearing}], \\ &= (\gamma + \omega)V_M - \sigma E - \delta E,\end{aligned}$$

273

$$\begin{aligned}\frac{dI}{dt} &= [\text{Emergence of infectivity}] - [\text{Loss of infectivity}] - [\text{Litter clearing}], \\ &= \sigma E - \mu I - \delta I.\end{aligned}$$

274 A reference implementation of the model in the programming language R (R Core Team,  
 275 2018) is available at <https://github.com/nikcunniffe/Citrus-Greasy-Spot>; it relies on the R

276 package `deSolve` (Soetaert *et al.*, 2010) for numerical solution of ordinary differential  
 277 equations.

### 278 *Area-wide disease management*

279 A key simplification in our model is that the rate of primary infection is held constant.  
 280 For disease management attempted by a single grower in isolation this is a reasonable  
 281 assumption, inasmuch as the primary infection pathway is totally unaffected by control done  
 282 within the grove. However, if other growers were also to attempt to control disease, this  
 283 would clearly lead to a reduction in the amount of exported inoculum by these growers. In  
 284 turn this would lead to a reduction in rates of primary infection across the entire region, since  
 285 all growers would then suffer less infection. To account for this feedback between the local  
 286 intensity of disease control and area-wide rates of primary infection, we extended the initial  
 287 mathematical model to include two populations of grower: controllers (C) and non-controllers  
 288 (NC). This modified model allows us to understand the performance of area-wide  
 289 management.  
 290

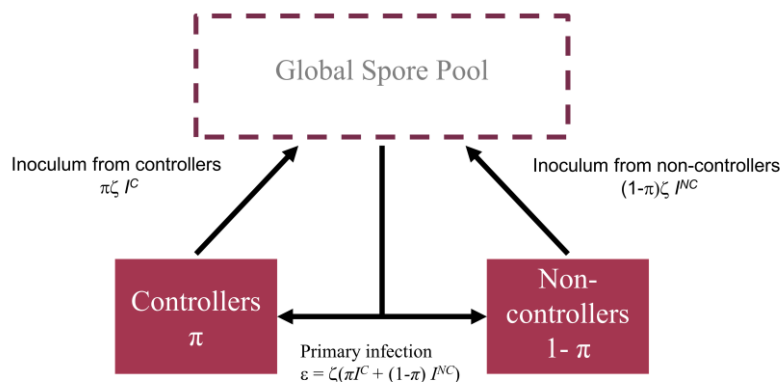

291  
 292 **Figure 3. Schematic showing the structure of the mathematical model for area-wide implementation of**  
 293 **control. The contribution of a grove to the area-wide primary infection rate depends on its control status.**  
 294 **Inoculum from both types of growers mixes in the global spore pool and falls on any single grove of either**  
 295 **type in equal measure.**  
 296

297 We assume these two groups differ in how they manage CGS; the controllers  
 298 undertake localised control and clear leaf litter at rate  $\delta$ . The non-controllers do not clear litter  
 299 (i.e. have  $\delta$  fixed at zero). We also assume that there is no spatial structure, thus all growers in  
 300 the region of interest within each class are homogenous in their control practices and grove  
 301 size. The model therefore tracks the average disease dynamics experienced by a typical  
 302 grower in each class. For simplicity we furthermore assume that all inoculum causing primary  
 303 infection is generated from somewhere within the modelled region, i.e. there is no very long-  
 304 distance spread from outwith the set of groves tracked by our model or from more local  
 305 sources of inoculum within the region such as non-cultivated citrus.

306 Under this scenario, the rate of primary infection ( $\varepsilon$ ) is no longer constant but should  
 307 vary as  $\varepsilon = \zeta(\pi I^C + (1-\pi) I^{NC})$  (Fig. 3), in which  $\pi$  is the proportion of growers controlling  
 308 disease and  $I^C$  and  $I^{NC}$  correspond to the levels of infection in typical groves of controllers and

309 non-controllers, respectively. To ensure the results of the area-wide model are consistent with  
 310 the underlying single-grower model, we set the constant of proportionality,  $\zeta$ , as  $\zeta = \varepsilon / I_\infty$ ,  
 311 where  $I_\infty$  is the equilibrium level of infection in the absence of control and  $\varepsilon$  is the rate of  
 312 primary infection, both lifted from the core single-grower model.

313 The new model for the controllers is defined as follows, with terms that differ from the  
 314 single-grower model – or which differ between controllers and non-controllers – highlighted  
 315 in red. Note the additional superscripts on the state variables, e.g.  $S_F^C$  corresponds to  $S_F$  for  
 316 growers which control disease (the corresponding state variable for the non-controllers is  
 317  $S_F^{NC}$ ).

$$\begin{aligned}
 \frac{dS_F^C}{dt} &= \rho - \zeta(\pi I^C + (1-\pi)I^{NC})\nu S_F^C - \beta\nu S_F^C I^C - \eta S_F^C, \\
 \frac{dA_F^C}{dt} &= \zeta(\pi I^C + (1-\pi)I^{NC})\nu S_F^C + \beta\nu S_F^C I^C - \eta A_F^C, \\
 \frac{dS_M^C}{dt} &= \eta S_F^C - \zeta(\pi I^C + (1-\pi)I^{NC})S_M^C - \beta S_M^C I^C - \gamma S_M^C, \\
 318 \quad \frac{dA_M^C}{dt} &= \zeta(\pi I^C + (1-\pi)I^{NC})S_M^C + \beta S_M^C I^C - \gamma A_M^C - \alpha A_M^C, \\
 \frac{dV_M^C}{dt} &= \alpha A_M^C + \eta A_F^C - \gamma V_M^C - \omega V_M^C, \\
 \frac{dE^C}{dt} &= (\gamma + \omega)V_M^C - \sigma E^C - \delta E^C, \\
 \frac{dI^C}{dt} &= \sigma E^C - \mu I^C - \delta I^C.
 \end{aligned}$$

319 The equations for growers who do not control disease are very similar:

$$\begin{aligned}
 \frac{dS_F^{NC}}{dt} &= \rho - \zeta(\pi I^C + (1-\pi)I^{NC})\nu S_F^{NC} - \beta\nu S_F^{NC} I^{NC} - \eta S_F^{NC}, \\
 \frac{dA_F^{NC}}{dt} &= \zeta(\pi I^C + (1-\pi)I^{NC})\nu S_F^{NC} + \beta\nu S_F^{NC} I^{NC} - \eta A_F^{NC}, \\
 \frac{dS_M^{NC}}{dt} &= \eta S_F^{NC} - \zeta(\pi I^C + (1-\pi)I^{NC})S_M^{NC} - \beta S_M^{NC} I^{NC} - \gamma S_M^{NC}, \\
 320 \quad \frac{dA_M^{NC}}{dt} &= \zeta(\pi I^C + (1-\pi)I^{NC})S_M^{NC} + \beta S_M^{NC} I^{NC} - \gamma A_M^{NC} - \alpha A_M^{NC}, \\
 \frac{dV_M^{NC}}{dt} &= \alpha A_M^{NC} + \eta A_F^{NC} - \gamma V_M^{NC} - \omega V_M^{NC}, \\
 \frac{dE^{NC}}{dt} &= (\gamma + \omega)V_M^{NC} - \sigma E^{NC}, \\
 \frac{dI^{NC}}{dt} &= \sigma E^{NC} - \mu I^{NC}.
 \end{aligned}$$

321 The only qualitative difference between the models for the two types of grower is that the  $\delta I$   
322 and  $\delta E$  terms are absent from the final equation for the non-controlling growers.

323

## 324 Results

325

### 326 *Spatial variability among plant heights*

327 The proportion of symptomatic leaves at individual heights (0.7m, 1.3m, 2.0m) on  
328 individual plants varied between 0.70 (i.e. 14 out of 20) and 1.0 (i.e. 20 out of 20), with  
329 overall mean 0.90. There was a significant interaction between grove and height (Likelihood  
330 Ratio Test:  $\chi_4^2 = 22.56$ ;  $p < 0.001$ ), with an increase in disease severity with height in the  
331 most heavily infected grove, but no increase in the other two groves. Since there was only a  
332 response to height in one out of the three groves tested, we conclude that there was no reliable  
333 effect of height on disease severity (see also Supplementary Text 1).

334

### 335 *Prevalence and Incidence in Recôncavo da Bahia*

336 Typical symptoms of CGS were found in all sampled groves, leading to a 100%  
337 prevalence. Symptoms were also detected on every assessed plant in each single grove,  
338 leading to a 100% incidence.

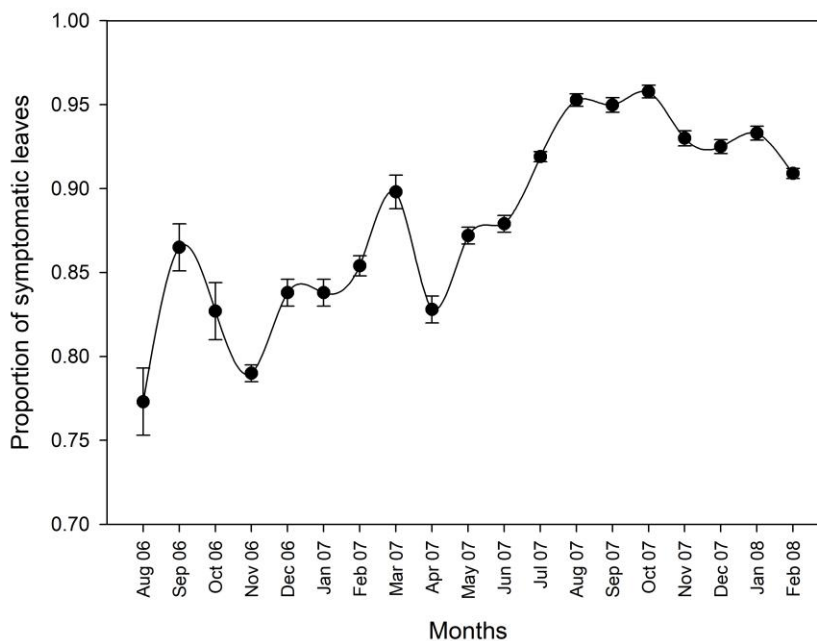

339

340 **Figure 4. Progress of citrus greasy spot measured as proportion of symptomatic leaves in ten sweet orange**  
341 **groves between August 2006 and February 2008 in Cruz das Almas, Recôncavo Baiano, Brazil. Bars**  
342 **represent standard error.**

343

344

345 *CGS temporal pattern*

346 CGS symptoms were observed in 100% of evaluations, groves, plants and plant  
347 quadrants in each of the ten monthly sampled areas in the Cruz das Almas municipality. The  
348 only variability in these results was detected for the proportion of symptomatic leaves (*psl*),  
349 which increased over 19 months, ranging from 0.77 in August 2006 to a maximum of 0.96 in  
350 October 2007 (Fig. 4). Although there was some systematic linear increase in the incidence,  
351 oscillations were found. However, there were insufficient data to test for periodic behaviour  
352 in *psl*, e.g. via spectral analysis.

353

354 *Weather variables*

355 Distributed lag analysis performed between the weather variables and CGS *psl* did not  
356 reveal any significant relationship (Fig. 5).

357

358 *Spatial pattern and dynamics*

359 It was not possible to perform any analysis of data from HL3 (among groves) and HL4  
360 (among municipalities) due to lack of variability. In HL1 (plant quadrants) 58% of *D* values  
361 were statistically similar to 1 (randomness), whereas 2% were above 1 (aggregation), and  
362 40% below 1 (regularity) (Fig. 6A). At HL2 (plants), the index of dispersion (*D*) had 76%,  
363 12% and 12% of observations statistically equal to, higher than and lower than 1, respectively  
364 (Fig. 6B). No relationship between *D* and the observed range of CGS *psl* could be observed,  
365 for plant quadrants or plants (Fig. 6). The predominance of *D* values  $\leq 1$  for HL1 and HL2  
366 could be confirmed by temporal dynamics of *D* means (Fig. 7) and the very low standard  
367 errors reinforce this point.

368 The binary power law was also used to analyse the CGS spatial patterns in HL1 and  
369 HL2. The regression between  $\log(V_{\text{bin}})$  and  $\log(V_{\text{obs}})$  was highly significant for both  
370 spatial levels (Fig. 8). The residuals were randomly distributed, but in both cases the  
371 coefficients of determination were below 0.7. The regression parameters,  $\log(A)$  and  $b$ , were  
372 significantly lower than 0 and 1, respectively [( $\log(A)$ ):  $t(380) = -16.2$ ,  $p < .00001$ ), ( $b$ ):  $t$   
373 (380) = 28.7,  $p < .0001$ ] for HL1 (quadrants) and HL2 (plants) [( $\log(A)$ ):  $t(190) = -4.4$ ,  $p <$   
374  $.00001$ ), ( $b$ ):  $t(190) = 13.1$ ,  $p < .00001$ ] (Fig. 8).

375

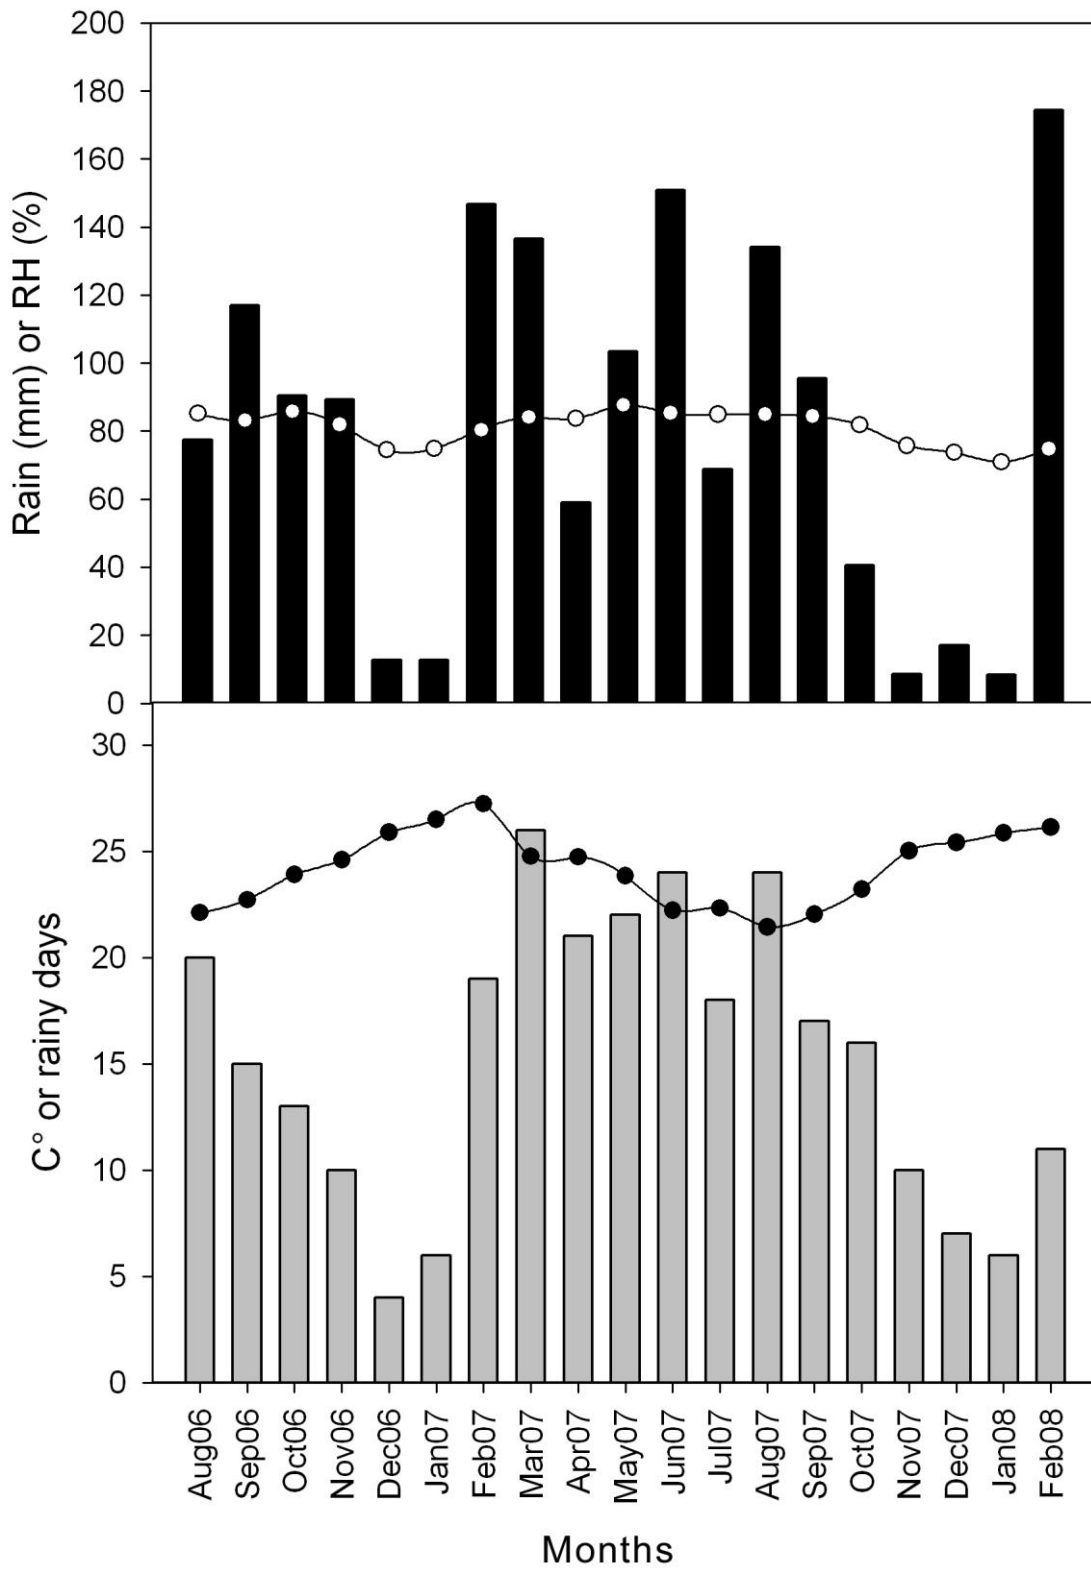

376

377 **Figure 5. Mean monthly values for weather variables in Recôncavo Baiano between August 2006 and**  
378 **February 2008. Lines are relative air humidity or temperature, bars area rain or number of rainy days.**

379

380

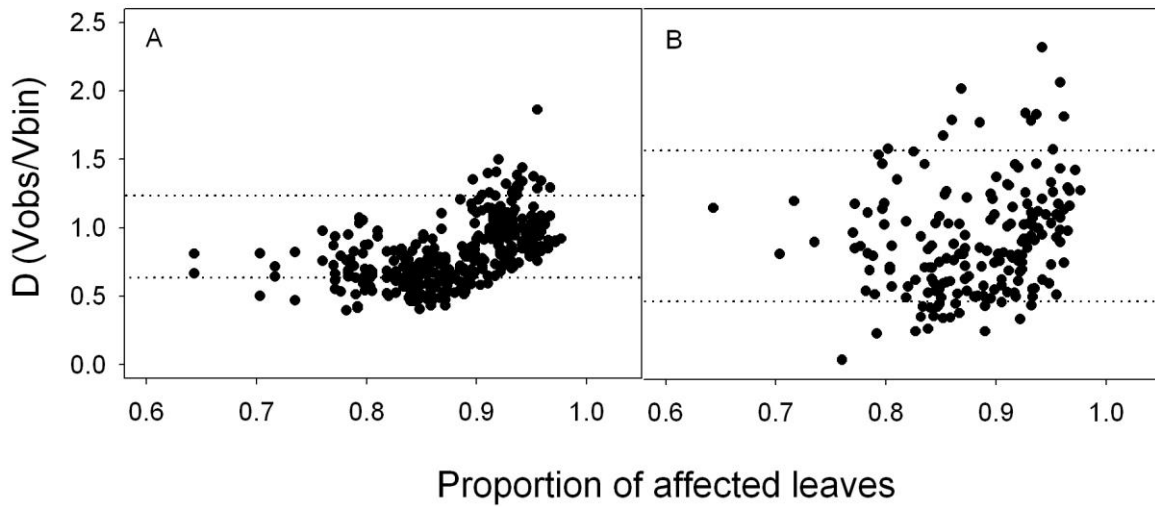

381

382 **Figure 6. Relationship between citrus greasy spot incidence in leaves and binomial index of dispersion ( $D$ )**  
383 **for quadrants (A) and plants (B), in ten sweet orange groves of Recôncavo Baiano, Brazil. Horizontal**  
384 **dotted lines indicate the randomness upper and lower limits for each spatial level. Ds indicate aggregation**  
385 **when above the upper limit and regularity when below the lower limit.**

386

387

388

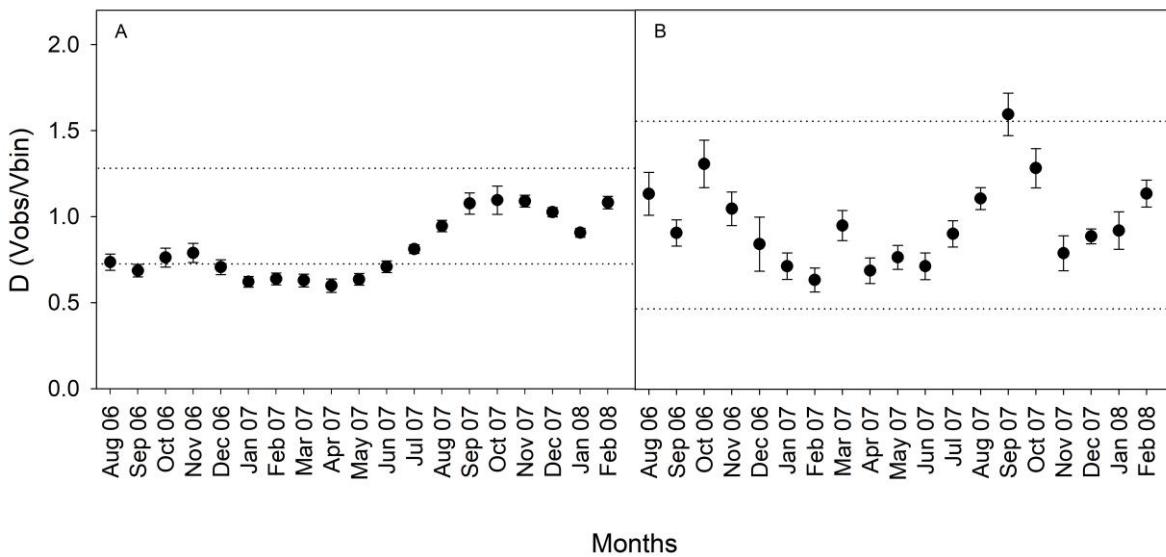

389

390 **Figure 7. Binomial index of dispersion ( $D$ ) dynamics for citrus greasy spot in quadrants (A) and plants (B)**  
391 **in ten sweet orange groves in Recôncavo Baiano, Brazil. Values not different from 1 indicate randomness;**  
392 **values above 1 indicate aggregation and those below 1, regularity. Vertical bars indicate standard error.**

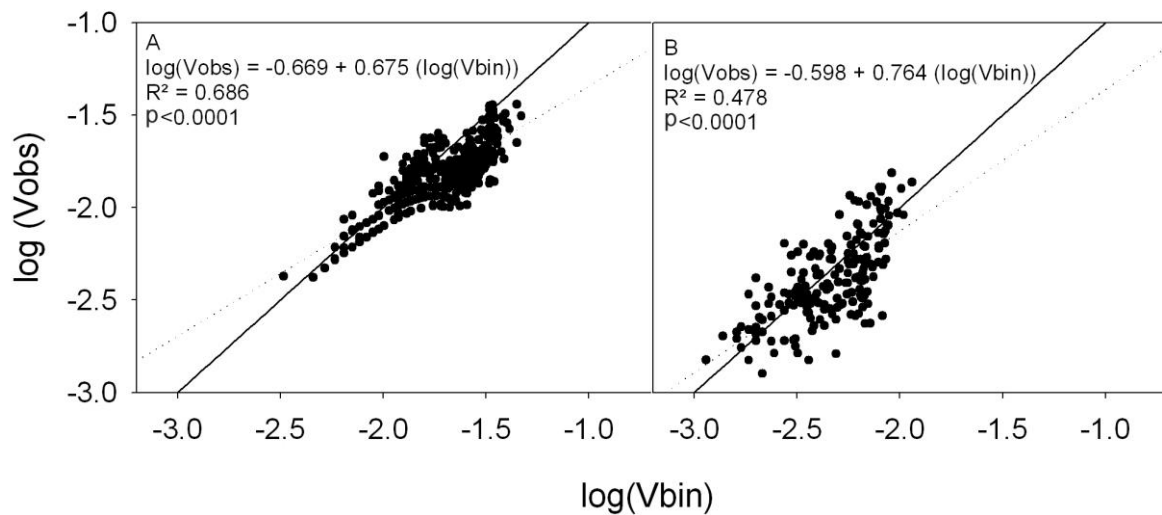

393  
394 **Figure 8. Binary power law. Relationship between the logarithms of observed variance and binomial**  
395 **variance for citrus greasy spot in quadrants (A) and plants (B) in ten sweet orange groves in Recôncavo**  
396 **Baiano, Brazil. Continuous line represents the expected relationship under randomness and the dotted**  
397 **line, the actual regressions. The regressions were significant ( $p < 0.0001$ ) and the parameters  $\log(A)$  and  $b$**   
398 **were significantly lower than 0 and 1, respectively for both cases.**  
399

#### 400 *Model parameterisation*

401 We assume that leaves mature after approximately three months (Spiegel-Roy &  
402 Goldschmidt, 1996), and so set the rate at which flush transitions to become mature leaves to  
403 be  $\eta = 1/3 \text{ month}^{-1}$ . We furthermore assume that the average lifetime of a leaf is  
404 approximately one year (Wallace *et al.* 1954, Spiegel-Roy & Goldschmidt, 1996), which –  
405 after accounting for an average of three months spent as flush – means that the rate of natural  
406 death of mature leaves should be  $\gamma = 1/9 \text{ month}^{-1}$ . Figure 1 of Turrell (1961) indicates that a  
407 ten-year old citrus tree would have approximately 70,000 leaves. Taking this as a rough  
408 estimate of the number of leaves on a mature tree in the absence of disease – predicted to be  
409  $\bar{S}_F = \rho/\eta$  and  $\bar{S}_M = \rho/\gamma$  as the steady state of the system of differential equations for the  
410 single-grower model when there is no disease – allows us to fix the rate of production of flush  
411 to be  $\rho = 6,000 \text{ month}^{-1}$  (where, in the light of the approximate nature of our calculation, we  
412 have rounded this estimate to only a single significant figure).

413 The incubation period between infection of a mature leaf and first emergence of symptoms is  
414 approximately two months (Mondal & Timmer, 2006a), and so we take the rate of emergence  
415 of symptoms on mature leaves to be  $\alpha = 1/2 \text{ month}^{-1}$ . Since the average lifetime of a diseased  
416 leaf is approximately three months (Timmer & Gottwald, 2000; Timmer *et al.*, 2000),  $1/(\gamma +$   
417  $\omega)$  should be 3 months, which given our earlier estimate for the value of  $\gamma$  allows us to set the  
418 rate of disease-induced death to be  $\omega = 2/9 \text{ month}^{-1}$ . Data presented in Mondal & Timmer  
419 (2002) suggest it takes approximately two months for sporulation to start after an infected leaf  
420 falls to the ground, and that – under constant conditions – sporulation would cease after three



421 months. We therefore take the rate at which pre-infectious leaf litter enters the infected class  
 422 to be  $\sigma = 1/2 \text{ month}^{-1}$ , and the rate of loss of infectivity of infectious leaf litter to be  $\mu = 1$   
 423  $\text{month}^{-1}$  (since litter is actively producing spores for an average of one month).

424 We assume that recently emerged and mature leaves are equally susceptible (Mondal  
 425 & Timmer, 2006a), and so take the proportionate susceptibility to be  $\nu = 1$ . Noting that  
 426 clearing fallen litter is uncommon in Bahia, we take the default rate of clearance to be  $\delta = 0$   
 427 (although we scan over values of this parameter when we model disease management; see  
 428 below).

429

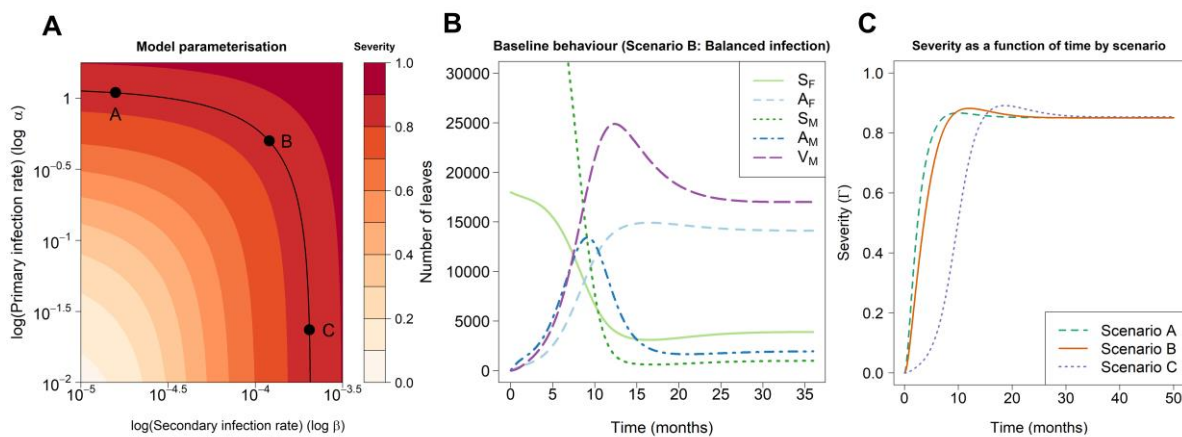

430

431 **Figure 9. Parameterisation of the single-grower model. (A) Terminal disease severity as a function of the**  
 432 **primary ( $\epsilon$ ) and secondary ( $\beta$ ) infection rates (each axis is on a  $\log_{10}$  scale). Pairs of values leading to**  
 433 **severity 0.85 – which roughly matches our disease spread data (cf. Fig. 4) – are linked with the black**  
 434 **curve. Three parameter scenarios are identified and marked with black dots: Scenario A (high primary**  
 435 **infection but low secondary infection), Scenario B (balanced primary and secondary infection) and**  
 436 **Scenario C (low primary infection but high secondary infection). (B) Baseline behaviour of the model in**  
 437 **Scenario B, showing the numbers of leaves in each compartment on the average tree within a grove for**  
 438 **three years after first introduction of the disease into a grove of mature trees. (C) Severity as a function of**  
 439 **time under each parameterisation scenario.**

440

#### 441 *Scenarios for primary and secondary infection*

442 The only remaining model parameters that remain to be fixed are the rates of primary  
 443 ( $\epsilon$ ) and secondary ( $\beta$ ) infection. We identify reasonable values of these parameters by  
 444 searching for pairs of values leading to  $psl$  of  $\Gamma = 0.85$  when the model has reached its  
 445 disease-present equilibrium, to match the data taken in our survey (cf. Fig. 4). Given we are  
 446 estimating a pair of parameters ( $\epsilon$  and  $\beta$ ) from a single datum (equilibrium  $psl$ ), there are an  
 447 infinite number of pairs of parameter values which lead to the desired equilibrium severity  
 448 (marked by the black curve on Fig. 9A). Our current data do not allow us to distinguish the  
 449 values of these parameters in more detail.

450 From this set of possible parameters, we identify three representative pairs of values  
451 corresponding to the following three illustrative scenarios.

452 **Scenario A (“Primary-dominated”).** High Primary, Low Secondary, with  $\varepsilon \approx 1.1 \text{ month}^{-1}$   
453 and  $\beta \approx 1.6 \times 10^{-5} \text{ month}^{-1}$ , in which most infection is caused by sources external to the grove  
454 of interest.

455 **Scenario B (“Balanced infection”).** Balanced Primary and Secondary, with  $\varepsilon \approx 5.0 \times 10^{-1}$   
456  $\text{month}^{-1}$  and  $\beta \approx 1.2 \times 10^{-4} \text{ month}^{-1}$ , in which the epidemic is driven roughly equally from  
457 sources within the grove *vs.* external to the grove.

458 **Scenario C (“Secondary-dominated”).** Low Primary, High Secondary, with  $\varepsilon \approx 2.3 \times 10^{-2}$   
459  $\text{month}^{-1}$  and  $\beta \approx 2.1 \times 10^{-4} \text{ month}^{-1}$ , with most infection coming from within the grove of  
460 interest.

461 Disease reaches equilibrium following first introduction in a mature grove rapidly  
462 under all three scenarios (shown in Fig. 9B for the balanced infection scenario). At  
463 equilibrium the rate of production of new susceptible flush is equal to the sum of the outflows  
464 of flush due to leaf maturation and flush leaf infection, with the rate of flush maturation equal  
465 to sum of the rates of mature leaf infection and mature leaf natural death (*cf.* Fig 2; the sum of  
466 flows into and out of each compartment are equal, for each compartment). While there are  
467 differences in the initial response of severity to time between scenarios (Fig. 10C), reflecting  
468 a transition from “monomolecular-like” (primary-dominated scenario) to “logistic-like”  
469 (secondary-dominated scenario) disease progress curves (Madden *et al.* 2007), differences are  
470 relatively slight. Any distinction between the scenarios is certainly not captured in the data we  
471 have taken here, since the disease was already very well-established in the groves we studied.  
472 This reiterates the idea that further experimental work would be required to conclusively  
473 disentangle the relative rates of the two infection pathways.

474

#### 475 *Modelling disease control*

476 Although not captured in our data, the relative balance of primary and secondary  
477 infection can have strong implications upon which types of control can be successful  
478 (Bassanezi *et al.*, 2013; Bergamin Filho *et al.*, 2016). To explore this further, we consider  
479 removal of fallen leaf litter. Following the logic concerning roguing given in Cunniffe *et al.*  
480 (2014), if the leaf litter is removed every  $\Delta$  months, then the average fallen leaf remains on  
481 the ground for  $\Delta/2$  months, and so – assuming that all leaves are removed on each round of  
482 litter removal – the appropriate rate of removal in our model is  $\delta = 2/\Delta$ .

483

#### 484 *Sensitivity analysis of the single-grower model*

485 We performed a sensitivity analysis to examine how changes in parameter values  
486 affected terminal disease severity in the single-grower model across each of the primary-  
487 infection dominated, the balanced and the secondary-infection dominated scenarios. The  
488 response of the equilibrium severity did not vary between scenarios for the majority of the

489 epidemiological parameters we considered (Figs. 10D–I), since the effects of these parameters  
 490 do not interact with the rates of infection. Most patterns were intuitive. For example, the  
 491 severity decreases as the relative susceptibility of flush ( $v$ ) decreases (Fig. 10D). We note,  
 492 however, that it is unsurprising that terminal severity did not vary with the average latent  
 493 period for leaf litter ( $1/\sigma$ ; Fig. 10I), since the default parameterisation for the rate of removal  
 494 of litter  $\delta$  is 0. As it is never cleared, the litter will always become infectious and thus  
 495 contribute to terminal severity, irrespective of the latent period on the ground.  
 496

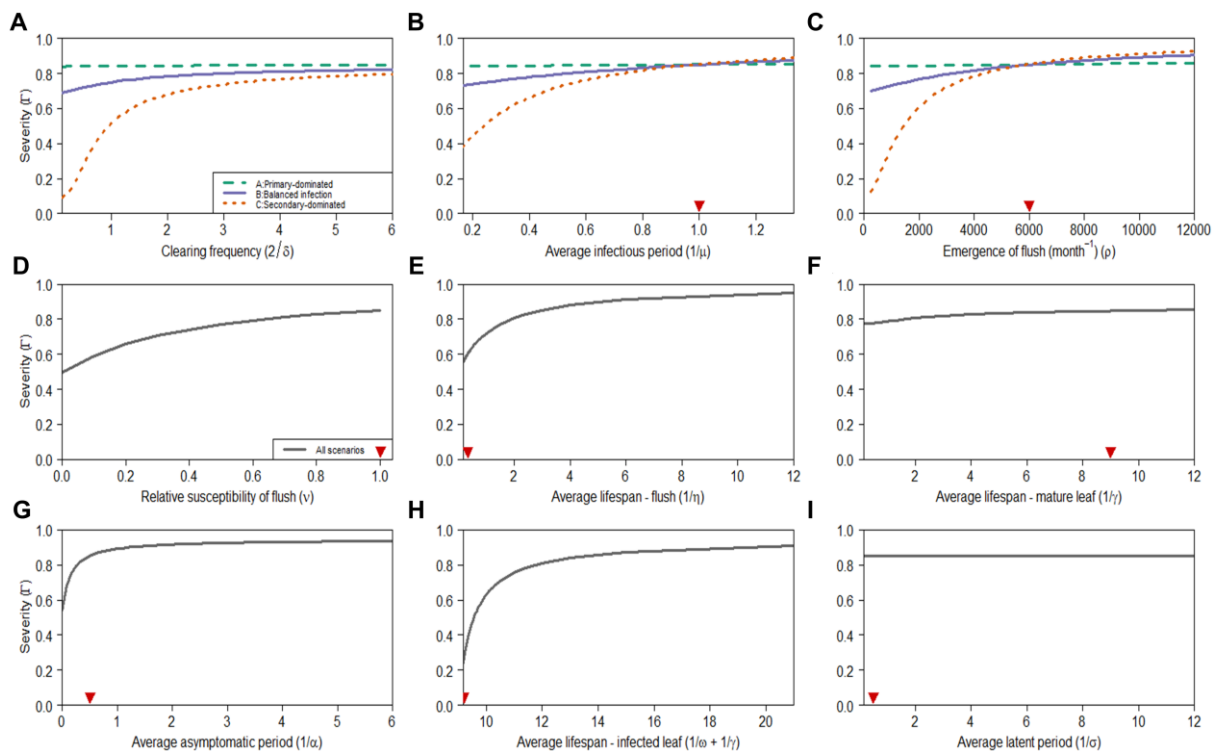

497  
 498 **Figure 10. Sensitivity Analysis: impact of parameter values on equilibrium severity.** (A) Interval between  
 499 successive clearances of leaf litter. (B) Average lifespan of diseased leaf (without control). (C) Birth rate of  
 500 flush. (D) Relative susceptibility of flush to mature leaves. (E) Average age of maturity (“lifespan”) of  
 501 flush. (F) Average lifespan of mature leaves in a disease-free system. (G) Average asymptomatic period.  
 502 (H) Average infectious period of fallen leaves. (I) Average latent period. Red arrows on the x-axes show  
 503 default parameterisation. All periods are in months. The parameter scenario only affects the responses  
 504 panels A-C, in which cases the scenarios are distinguished by different types and colours of line; in panels  
 505 D- I the responses in all three parameter scenarios are co-incident.  
 506

507 Responses to three parameters, however, did vary across infection rate scenarios. An  
 508 increased birth rate of flush ( $\rho$ ; Fig. 10C) has its greatest impact on the secondary-dominated  
 509 scenario. Similarly, short infectious periods ( $1/\mu$ ; Fig. 10B) caused substantial reductions in  
 510 terminal severity in the secondary-dominated scenario, though infectious periods  $>2$  months  
 511 resulted in little change from the baseline parameterisation (1 month). The changes in  
 512 terminal severity for the primary-dominated and balanced infection scenarios were less  
 513 severe. In the single-grower version of the model, there is no dependence of rates of primary  
 514 infection on the amount of infection present within the grove, so changes in infectious periods  
 515 have little impact on the amount of infection coming from these sources.

516 Considering the response of the equilibrium severity to different frequencies of litter  
 517 removal (Fig. 10A) reveals significant differences in the predicted effectiveness of control  
 518 based on the relative balance of primary and secondary infection. In particular, under  
 519 Scenario A, the high rate of inoculum ingress from outside the grove means that purely  
 520 localised control based on local removal of litter has very little effect on the disease severity,  
 521 no matter how frequently the litter is removed. Even very high rates of local litter removal  
 522 under Scenario B – in which both primary and secondary infection have a role in driving the  
 523 epidemic dynamics – also do not greatly affect the level of disease (e.g. weekly leaf removal  
 524 leads to a reduction in terminal severity from 85% to around 70%). However unsurprisingly  
 525 in Scenario C – in which local inoculum almost entirely drives the epidemic – local removal  
 526 of leaf litter can be very effective, even if only practised by the single grower in question.

527

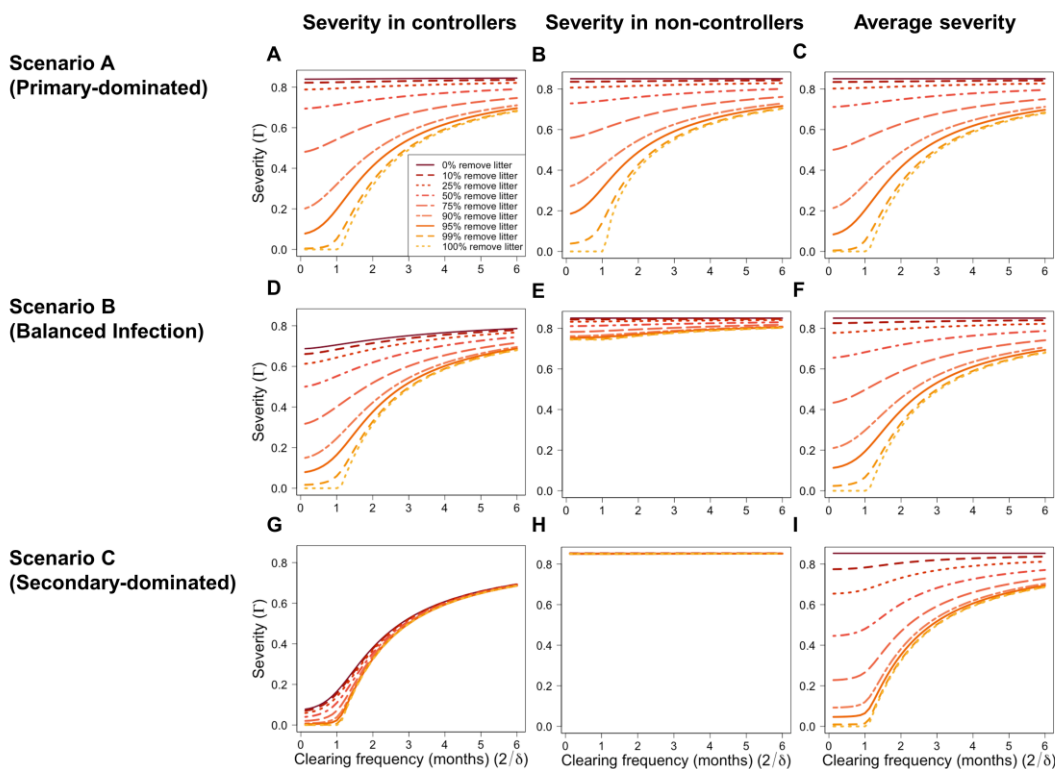

528

529 **Figure 11. Area-wide disease management. The impact of a proportion  $\pi$  of growers controlling disease**  
 530 **by local removal of leaf litter (at average frequency  $2/\delta$ ) on disease severity in groves of controllers ( $\Gamma_C$ ;**  
 531 **panels A, D and G), non-controllers ( $\Gamma_{NC}$ ; panels B, E and H) and on average over all groves**  
 532 **( $\pi\Gamma_C + (1-\pi)\Gamma_{NC}$ ; panels C, F and I). The top row (panels A-C) shows the primary-dominated**  
 533 **parameter scenario (Scenario A); the middle row (panels D-F) shows the balanced infection parameter**  
 534 **scenario (Scenario B), and the bottom row (panels G-I) shows the secondary-dominated parameter**  
 535 **scenario (Scenario C).**

536

537

538 *Area-wide disease management*

539 While the results given in Fig. 10A provide a useful baseline, disease control by  
 540 removal of leaf litter is more likely to be more successful if adopted by an entire community  
 541 of growers, since this would reduce sources of inoculum for all groves. We demonstrate this  
 542 using our model of area-wide control (Fig. 11), assuming that the rate of primary infection,  $\varepsilon$ ,  
 543 depends on the proportion of growers ( $\pi$ ) practicing control (see Methods). The performance  
 544 of disease management within the set of groves doing control depends strongly on the  
 545 parameter scenario (Figs. 11A,D,G), with the results shown in Fig. 10A providing an upper  
 546 bound on the severity when no one else clears leaf litter (i.e. when  $\pi = 0$ ). Similarly, the  
 547 results shown in Fig. 10A provide a lower bound on severity for growers not doing control  
 548 (Figs. 11B, E, H). In all parameter scenarios, removal of litter every month or so is required  
 549 for eradication of disease if there is 100% compliance. However, the performance averaged  
 550 over all growers when there is an intermediate level of compliance (Figs. 11C, F, I) depends  
 551 on the parameter scenario. For example, monthly removal of litter by 75% of growers leads to  
 552 average severities over all groves of 0.56, 0.50 and 0.27 in our primary-dominated, balanced  
 553 infection and secondary-dominated parameter scenarios, respectively.  
 554

555 *Frequency of litter removal for eradication*

556 Area-wide eradication requires all growers to participate (i.e.  $\pi = 1$ ). Our numerical work  
 557 suggests it also requires growers to remove leaf litter at least once a month or so, and that this  
 558 minimum removal frequency does not depend on the parameter scenario. This can be explained  
 559 using the basic reproduction number ( $R_0$ ). In particular, in the area-wide disease spread model,  
 560 when  $\pi = 1$  and so when all growers control disease, the basic reproduction number is given by

$$\begin{aligned}
 R_0 &= \frac{1}{\mu + \delta} \left( (\beta + \zeta)v\bar{S}_F + (\beta + \zeta)\bar{S}_M \frac{\alpha}{\alpha + \gamma} \right) \frac{\sigma}{\sigma + \delta}, \\
 &= \left( \frac{(\beta + \zeta)\rho}{\mu + \delta} \right) \left( \frac{\sigma}{\sigma + \delta} \right) \left( \frac{v}{\eta} + \frac{\alpha}{\gamma(\alpha + \gamma)} \right).
 \end{aligned}$$

562 The expression can be understood by considering the number of infections caused by a single  
 563 infected leaf introduced into the disease-free system, within which the numbers of susceptible  
 564 flush and mature leaves are  $\bar{S}_F = \rho / \eta$  and  $\bar{S}_M = \rho / \gamma$ , respectively. The initially infected leaf  
 565 remains infectious for  $\frac{1}{\mu + \delta}$  units of time. It infects flush leaves at net rate  $(\beta + \zeta)v\bar{S}_F$  and  
 566 mature leaves at net rate  $(\beta + \zeta)\bar{S}_M$ . Any (asymptomatic) infected flush leaf definitely  
 567 becomes a symptomatic mature leaf, whereas an asymptomatic infected mature leaf becomes  
 568 symptomatic before being abscised with probability  $\frac{\alpha}{\alpha + \gamma}$  (since it has to develop symptoms  
 569 and so move to the  $V_M$  compartment before falling to the ground). In both cases mature leaves  
 570 detach to become uninfected fallen leaf litter, and become infectious before decaying with

571 probability  $\frac{\sigma}{\sigma + \delta}$ . This completes a single infection cycle: combining the various rates and  
572 probabilities leads to the expression for  $R_0$  given above.

573 The expression for  $R_0$  is a decreasing function of the litter clearance rate  $\delta$ , which – for  
574 all parameterisations of the model (Table 1) – is below 1 if  $\delta > 1.81$  per month. Given the  
575 relationship  $\delta = 2/\Delta$ , this corresponds to litter removal every  $\Delta = 2/1.81 \sim 1.1$  months, i.e. the  
576 threshold obtained in all three parameter scenarios for the area-wide model (Figs. 11C,F,I).  
577 The particular parameter scenario is not important in setting this threshold because the value  
578 of  $(\beta + \zeta)$  is fixed at precisely the same value, i.e. that which leads to a terminal severity of  
579 0.85 in the single-grove model in the absence of disease management (the numeric value is  
580  $(\beta + \zeta) \approx 2.1 \times 10^{-4} \text{ month}^{-1}$ ).

581

## 582 Discussion

583

584 CGS symptoms were found in every single grove and plant, irrespective of sub-region,  
585 altitude, grove age or variety. This pattern was consistent over time for each of the ten  
586 sampled groves in Cruz das Almas, and so, at this spatial level (i.e. the region), CGS can be  
587 considered to be highly regularly dispersed. Our data therefore confirm the conclusion of the  
588 preliminary report of Silva *et al.* (2009) that CGS in Reconcavo is currently endemic in the  
589 sense that it is regularly found and very common in that particular area.

590 The level of *Z. citri* infection is more related to conditions for epiphytic growth than to  
591 the number of ascospores (Mondal & Timmer, 2003b). We did not find evidence that CGS  
592 intensity in Recôncavo Baiano is higher on the lower canopy as was previously found in  
593 Florida (Mondal *et al.*, 2003), perhaps since *psl* was so high for all heights. This can perhaps  
594 be linked to the negative logarithmic pattern for the number of trapped *Z. citri* ascospores at  
595 different heights reported in Florida; even at 7.5m some spores were captured (Mondal *et al.*,  
596 2003). Nevertheless, considering that the closest CGS inoculum source is ground level litter  
597 (Mondal & Timmer, 2006b), lack of variability over heights throughout regions indicates that  
598 conditions are conducive for *Z. citri* dispersion/infection and that CGS is very widespread.

599 The ubiquity of CGS was confirmed for almost all sampling units during the monthly  
600 evaluations in Cruz das Almas groves. The increase in *psl* was somewhat expected, as most  
601 reports show such pattern for Cuba, Costa Rica and Florida (Garcia *et al.*, 1980; Hidalgo *et al.*,  
602 1997; Mondal & Timmer, 2003a). However, as those studies were primarily concerned  
603 with the development of CGS symptoms on new shoots, they reported a strong seasonality,  
604 and had incidences ranging from as low as 30% to as high as 100%. Here, as we focused on  
605 the presence of CGS on mature rather than on new leaves, we could evaluate what we  
606 consider the real incidence for the Recôncavo region, reflecting the epidemiology of the  
607 pathogen rather than the demography of its host.

608 Our distributed lag analysis supported no link between disease severity and abiotic  
609 environmental drivers. In Florida it was shown that the less intense epiphytic growth occurred  
610 in dry months, with growth speed increasing during the summer (Mondal & Timmer, 2003a).  
611 In Cuba, an increase in CGS incidence and severity during Summer was reported (rains and  
612 high relative air humidity) (Garcia *et al.*, 1980). However, in Recôncavo da Bahia climatic  
613 conditions appear to provide no obstacle to CGS, with no extreme temperatures, as well as  
614 long periods of high relative air humidity and only short periods without rain. Such conditions  
615 are ideal for the *Z. citri*-citrus interaction.

616 Since no variability was found in the fourth and third levels of the spatial hierarchy  
617 (i.e. among municipalities or groves), they were not analysed. When such analyses were  
618 feasible (i.e. among plant quadrants and plants), the index of dispersion indicated a random  
619 pattern for single evaluations and at both spatial levels. However, the general spatial pattern  
620 was regularity ( $\log(A) < 0$  and  $b < 1$ ) as shown by the binary power law. This favours the  
621 hypothesis that allo-infections (i.e. from inoculum coming from outside the grove) might be  
622 as important as auto-infections. This strengthens the case for area-wide management.

623 Spore trapping experiments could help to assess the allo-infection hypothesis. Another  
624 way of confirming the relative balance of auto- and allo-infection might be to collect data at  
625 lower disease severity levels, which could be used to determine the rates of primary and  
626 secondary infection  $\epsilon$  and  $\beta$  in our single-grower mathematical model (cf. Fig. 9A). Targetted  
627 experimentation, e.g. performing litter removal in some experimental plots while allowing  
628 disease to progress unhindered in others, would be another way to begin to disentangle the  
629 balance of the routes of infection. However, very large plots might be required to obtain a  
630 detectable effect. Such data would also allow us to verify the time-dynamics of our model,  
631 and in particular to verify that the time-progression in the number of leaves in each  
632 compartment over time is plausible (cf. Fig 10). However, we do not have such data in hand.

633 Given this uncertainty concerning the balance of the infection pathways, we restricted  
634 ourselves to a relatively simple mathematical model of the system, replicating only the  
635 important features of the *Z. citri* infection cycle, with all parameters taking constant values.  
636 Nevertheless, by systematising available knowledge on CGS epidemiology, our model allows  
637 us to understand potential effects of management. In particular, we have shown that cultural  
638 control – of the type that could be done by resource-poor growers in Northeastern Brazil –  
639 might potentially be successful. However, assuming primary infection is indeed at least  
640 somewhat implicated in CGS epidemiology, area-wide management would almost certainly  
641 be required (Bassanezi *et al.*, 2013; Bergamin Filho *et al.*, 2016) (Fig. 11). Conclusions would  
642 be similar for any localised control affecting only secondary within-grove infection, e.g.  
643 accelerating the decay of inoculum by treating litter with urea (Mondal & Timmer, 2003a).

644 In our single-grower model we assumed a constant rate of primary infection. This  
645 assumption is often made in models (e.g. Cunniffe *et al.*, 2015), including in studies fitting  
646 models to data (see e.g. Parry *et al.*, 2014). We later extended the model to include the  
647 behavior of other growers and the effects of area-wide control on any individual's local

648 epidemic. We then assumed that the rate of primary infection depends on the average level of  
649 infection area-wide. Even without full participation, our model showed concerted efforts  
650 across growers lead to large reductions in disease severity for growers who manage disease.

651 Rates of primary infection will also be affected by regional environmental conditions,  
652 as well as the spatial structure of the landscape. Here we ignored spatial structure and  
653 assumed homogeneity amongst growers of the same type. However, relaxing this condition  
654 would be an interesting extension to the model. The relative balance of primary infection to  
655 secondary infection would also vary depending on the size of the grove of interest (Hilker *et*  
656 *al.*, 2017), and its location within the landscape. Finally, in the area-wide model we assumed  
657 all primary infection was caused by inoculum produced within the set of citrus groves  
658 tracked. This allowed disease to be eradicated when all growers control disease. In practice  
659 some inoculum might come via very long-distance dispersal from outside the area of interest,  
660 or be produced on other sources such as non-cultivated citrus within the region. Our results  
661 are therefore an upper bound upon the levels of disease control that could be achieved. If  
662 other sources of inoculum do in fact exist, divergence from this optimal performance would  
663 be most significant for the scenario in which primary infection dominated (i.e. Scenario A).

664 *Z. citri* is already highly dispersed in Recôncavo of Bahia, with maximum CGS  
665 prevalence and incidence in plants and their quadrants, irrespective of the location of the  
666 groves or plant's age. This fact, associated with the high incidence in leaves seems a natural  
667 consequence of the way in which CGS has been viewed in that region; because it has never  
668 been considered important, it was never controlled. Hence, the incidence increased, but as this  
669 process has been cyclic and apparently quite slow, the disease is still not seen as a threat  
670 (Rodrigues, 2018). The situation resembles that previously in Florida, where prior to 1940  
671 CGS was not considered a serious problem (Mondal & Timmer, 2006a). Only when growers  
672 finally noted the disease was causing defoliation, did they begin to attempt control.

673 In light of our results, CGS can be regarded as endemic in Recôncavo da Bahia.  
674 Moreover, in Bahia state the disease is also found in other regions (unpublished). In contrast  
675 with the situation in São Paulo, the most important citrus producing region in Brazil, many  
676 diseases are not present in Recôncavo. For instance, this area is currently free from HLB  
677 (*Candidatus Liberibacter* spp.), leprosis (CiLV), citrus canker (*Xanthomonas citri* subsp.  
678 *citri*) and sweet orange scab (*Elsinöe australis*) (Laranjeira *et al.*, 2005). In this context, at  
679 least for the region we are concerned with, CGS cannot be regarded as a minor citrus disease.  
680 Nevertheless, growers face a temporal continuity of both host (perennial crop with multiple  
681 flushings per year) and pathogen (putative abundant inoculum due to favourable weather and  
682 multiple inoculum sources) coupled to a host spatial continuity represented by more than  
683 10,000 ha of citrus in the region (IBGE, 2017). Hence, due to its endemic status CGS control  
684 in Recôncavo will be a challenging task. Some growers try to invest in technology, but  
685 overall low input level farming represents the citrus industry. Citrus groves are established  
686 without long term planning and simple small-holder farming takes place. Growers often have  
687 a low educational level and low concern about general horticultural practices, soil  
688 management or plant protection. However, there is no evidence of different CGS intensity or  
689 perception according to groves' technological level (Rodrigues, 2018).



690 CGS control in the Recôncavo region will probably demand a set of practices at a  
691 frequency and cost which is incompatible with the current technological level and economic  
692 position of local citrus growers. Moreover, due to the abundance of inoculum, favourable  
693 weather and long-distance wind-dispersion of ascospores, localised control attempts in small  
694 groves may have a low probability of success. Therefore, if growers decide to tackle this  
695 disease, it is advisable that their efforts should be coordinated on a regional basis. Additional  
696 data would allow us to confirm this preliminary conclusion, as well as to continue to model  
697 the system. Collecting more disease spread data and using these data to parameterize more  
698 detailed mathematical models will form the basis of our future work on this pathosystem.

699

## 700 **Acknowledgements**

701

702 The authors would like to thank Mr Decio de Oliveira Almeida for technical  
703 support, and Dr Matthew Castle, Dr Adam Hall and Mr Elliott Bussell for useful discussions.  
704 FFL and ACFS are fellows of Conselho Nacional de Desenvolvimento Científico e  
705 Tecnológico (CNPq). The authors thank the anonymous reviewers and the editors for  
706 comments which were instrumental in greatly strengthening the final paper. Conceived and  
707 designed experiments: SXBS, FFL. Provided funds and materials: SXBS, FFL, HPSF.  
708 Performed the experiments: SXBS. Analyzed the data: SXBS, FFL. Designed the model:  
709 FFL, NJC. Analysed the model: NJC, REMW, FFL. Wrote the paper: FFL, NJC, REMW,  
710 SXBS. Contributed to drafting the manuscript: FFL, NJC, REMW, SXBS, ACFS. Part of this  
711 paper is from a MSc dissertation presented by SXBS to the Universidade Federal do  
712 Recôncavo da Bahia.

713

## 714 **References**

- 715 Bassanezi RB, Montesino LH, Gimenes-fernandes N *et al.*, 2013. Efficacy of Area-Wide  
716 Inoculum Reduction and Vector Control on Temporal Progress of Huanglongbing in  
717 Young Sweet Orange Plantings. *Plant Disease* **97**, 789–796.
- 718 Bates D, Machler M, Bolker B, Walker, S, 2015. Fitting Linear Mixed Effects Models using  
719 lme4. *Journal of Statistical Software* **67**, 1-48.
- 720 Becker RA, Wilks AR. 2018. maps: Draw Geographical Maps. R package version 3.3.0.  
721 <https://CRAN.R-project.org/package=maps>
- 722 Bergamin Filho A, Inoue-Nagata AK, Bassanezi RB *et al.*, 2016. The importance of primary  
723 inoculum and area-wide disease management to crop health and food security. *Food*  
724 *Security* **8**, 221–238.
- 725 Chatfield, 2004. *The Analysis of Time Series: An Introduction*. New York: Chapman & Hall.
- 726 Cunniffe NJ, Laranjeira FF, Neri FM, DeSimone RE, Gilligan C, 2014. Cost-effective control  
727 of plant disease when epidemiological knowledge is incomplete: modelling Bahia bark  
728 scaling of Citrus. *PLOS Computational Biology* **10**, e1003753.
- 729 Cunniffe NJ, Stutt ROJH, DeSimone RE, Gottwald TR, Gilligan CA, 2015. Optimising and  
730 Communicating Options for the Control of Invasive Plant Disease When There Is  
731 Epidemiological Uncertainty. *PLOS Computational Biology* **11**, 1–24.
- 732 Diaz J, Brown O, Herrera L, 1985. Influence of greasy spot (*Mycosphaerella citri*) Whiteside  
733 on Valencia orange yields. *Centro Agricola* **12**, 127–137.
- 734 Fellows I (2019) OpenStreetMap: Access to Open Street Map Raster Images. R package  
735 version 0.3.4. <https://CRAN.R-project.org/package=OpenStreetMap>
- 736 Fortin MJ, Dale MRT, 2005. *Spatial analysis: a guide for ecologists*.
- 737 Garcia R, Aguilar H, Herrera Y, 1980. Variaciones estacionales de la enfermedad mancha  
738 grasienta (*Mycosphaerella citri*) en la region de Jaguey Grande, Matanzas. Citricos y  
739 otros frutales. *Centro Agrícola Suplemento*, 107–119.
- 740 Hidalgo H, Sutton TB, Arauz F, 1997. Epidemiology and control of citrus greasy spot on  
741 Valencia orange in the humid tropics of Costa Rica. *Plant Disease*.
- 742 Hilker FM, Allen LJS, Bokil VA *et al.*, 2017. Modeling virus coinfection to inform  
743 management of Maize Lethal Necrosis in Kenya. *Phytopathology* **107**, 1095–1108.
- 744 IBGE, 2017. Quantidade produzida, valor da produção, área plantada e área colhida da  
745 lavoura permanente. *Produção agrícola municipal (PAM)*.
- 746 Laranjeira F, Amorin L, Bergamin Filho A, Aguilar-Vildoso C, Coletta Filho H, 2005.  
747 *Fungos, procaríotos e doenças abióticas*.
- 748 Laranjeira F, Filho A, Amorim L, Gottwald T, 2003. Dinâmica espacial da clorose variegada  
749 dos citros em três regiões do Estado de São Paulo. *Fitopatologia Brasileira*.

- 750 Lewis F, Butler A, Gilbert L, 2011. A unified approach to model selection using the  
751 likelihood ratio test. *Methods in Ecology and Evolution*. **2**, 155-162.
- 752 Looney SW, Gullledge TR, 1985. Commentaries: Use of the correlation coefficient with  
753 normal probability plots. *American Statistician*.
- 754 Madden L, Hughes G, 1995. Plant disease incidence: distributions, heterogeneity, and  
755 temporal analysis. *Annual Review of Phytopathology* **33**, 529–564.
- 756 Madden L, Hughes G, Van den Bosch F, 2007. *The Study of Plant Disease Epidemics* (L  
757 Madden, G Hughes, F Van den Bosch, Eds.). St. Paul, Minnesota, USA: APS Press.
- 758 Madden LV, Hughes G, Bucker Moraes W, Xu M, Turechek, WW, 2018. Twenty-five years  
759 of the binary power law for characterizing heterogeneity of disease incidence.  
760 *Phytopathology* **108**, 656-680.
- 761 Mondal SN, Gottwald TR, Timmer LW, 2003. Environmental factors affecting the release  
762 and dispersal of ascospores of *Mycosphaerella citri*. *Phytopathology* **93**, 1031–1036.
- 763 Mondal S, Timmer L, 2003a. Effect of urea, CaCO<sub>3</sub>, and dolomite on pseudothecial  
764 development and ascospore production of *Mycosphaerella citri*. *Plant Disease* **87**, 478–  
765 483.
- 766 Mondal S, Timmer L, 2003b. Environmental factors affecting pseudothecial development and  
767 ascospore production of *Mycosphaerella citri*, the cause of Citrus greasy spot.  
768 *Phytopathology* **93**, 1031–1036.
- 769 Mondal S, Timmer L, 2006a. Greasy spot, a serious endemic problem for citrus production in  
770 the Caribbean Basin. *Plant Disease* **90**, 532–538.
- 771 Mondal SN, Timmer LW, 2006b. Relationship of the severity of citrus greasy spot, caused by  
772 *Mycosphaerella citri*, to ascospore dose, epiphytic growth, leaf age, and fungicide  
773 timing. *Plant Disease* **90**, 220–224.
- 774 Parry M, Gibson GJ, Parnell S *et al.*, 2014. Bayesian inference for an emerging arboreal  
775 epidemic in the presence of control. *Proceedings of the National Academy of Sciences of*  
776 *the United States of America* **111**, 6258–62.
- 777 Paul PA, Lipps PE, De Wolf E *et al.*, 2007. A distributed lag analysis of the relationship  
778 between *Gibberella zae* inoculum density on wheat spikes and weather variables.  
779 *Phytopathology* **97**, 1608–1624.
- 780 R Core Team, 2018. R: a language and environment for statistical computing. R Foundation  
781 for Statistical Computing, Vienna, Austria. <https://www.R-project.org/>
- 782 Rodrigues LSS, 2018. *Diagnóstico fitossanitário participativo: ferramenta para o manejo de*  
783 *pragas da citricultura do Recôncavo Baiano*. Dissertation. Universidade Federal do  
784 Recôncavo da Bahia, 92p.
- 785 Santos T, 2012. *Parametrização e modelagem ex-ante da disseminação do HLB dos citros no*  
786 *Recôncavo da Bahia*. Dissertation. Universidade Federal do Recôncavo da Bahia, 103p.

- 787 Sherman J, Burke JM, Gent DH, 2019. Cooperation and coordination in plant disease  
788 management. *Phytopathology* **109**, 1720-1731.
- 789 Silva S, Laranjeira F, Soares A, Michereff S, 2009. Amostragem, caracterização de sintomas  
790 e escala diagramática da mancha graxa dos citros (*Mycosphaerella citri*) no Recôncavo  
791 Baiano. *Ciência Rural* **39**, 896–899.
- 792 Silva S, Soares A, Almeida D, Santos-Filho H, Laranjeira F, 2015. Temporal patterns of citrus  
793 greasy spot-induced defoliation of sweet orange cultivars in Brazil. *Annals of Applied*  
794 *Biology* **167**, 55–62.
- 795 Soetaert K, Petzoldt T, Woodrow Setzer R, 2010. Solving differential equations in R: package  
796 deSolve. *Journal of Statistical Software* **33**, 1-25.
- 797 Spiegel-Roy P, Goldschmidt EE, 1996. *Biology of citrus*.
- 798 Timmer L, Gottwald T, 2000. Greasy spot and similar diseases. In: Timmer LW, Garnsey SM  
799 GJ, ed. *Compendium of citrus disease*. St. Paul, Minnesota, USA: The American  
800 Phytopathological Society, 25–29.
- 801 Timmer LW, Roberts PD, Darhower HM *et al.*, 2000. Epidemiology and control of citrus  
802 greasy spot in different citrus-growing areas in Florida. *Plant Disease* **84**, 1294–1298.
- 803 Turrell F, 1961. Growth of the photosynthetic area of citrus. *Botanical Gazette* **122**, 284–298.
- 804 Wallace A, Zidan ZI, Mueller RT NC, 1954. Translocation of nitrogen in citrus trees. In:  
805 *Proceedings of the American Society of Horticultural Science*. American Society of  
806 Horticultural Science, 87–104.
- 807 Whiteside J, 1970. Etiology and epidemiology of citrus greasy spot. *Phytopathology* **60**,  
808 1409–1414.
- 809 Whiteside J, 1988. Greasy spot and greasy spot rind blotch. In: Timmer LW, Garnsey SM GJ,  
810 ed. *Compendium of citrus diseases*. St. Paul: American Phytopathological Society, 15–  
811 17.
- 812 Xu XM, Butt DJ, Van Santen G, 1995. A dynamic model simulating infection of apple leaves  
813 by *Venturia inaequalis*. *Plant Pathology* **84**, 1294–1298.
- 814
- 815

816 **SUPPLEMENTARY TEXT 1**

817

818 We examined data on the number (out of 20) of symptomatic leaves at each of 3 heights on 30  
819 plants in each of 3 groves.

820

821 The data were therefore as follows

| Height | Plant | PropSym | Grove | CountPlus | CountMinus |
|--------|-------|---------|-------|-----------|------------|
| 1 H1   | P1    | 0.80    | G1    | 16        | 4          |
| 2 H1   | P2    | 1.00    | G1    | 20        | 0          |
| 3 H1   | P3    | 1.00    | G1    | 20        | 0          |
| 4 H1   | P4    | 0.80    | G1    | 16        | 4          |
| 5 H1   | P5    | 0.90    | G1    | 18        | 2          |

828 [265 rows omitted]

829 (there were 270 such measurements, for 3 heights on 30 plants in 3 groves [i.e. 90 plants in  
830 total]).

831

832 The raw data are plotted below. It suggests that there might be an increase in severity with  
833 height in Grove 1, but that any effect is more marked in Groves 2 and 3.

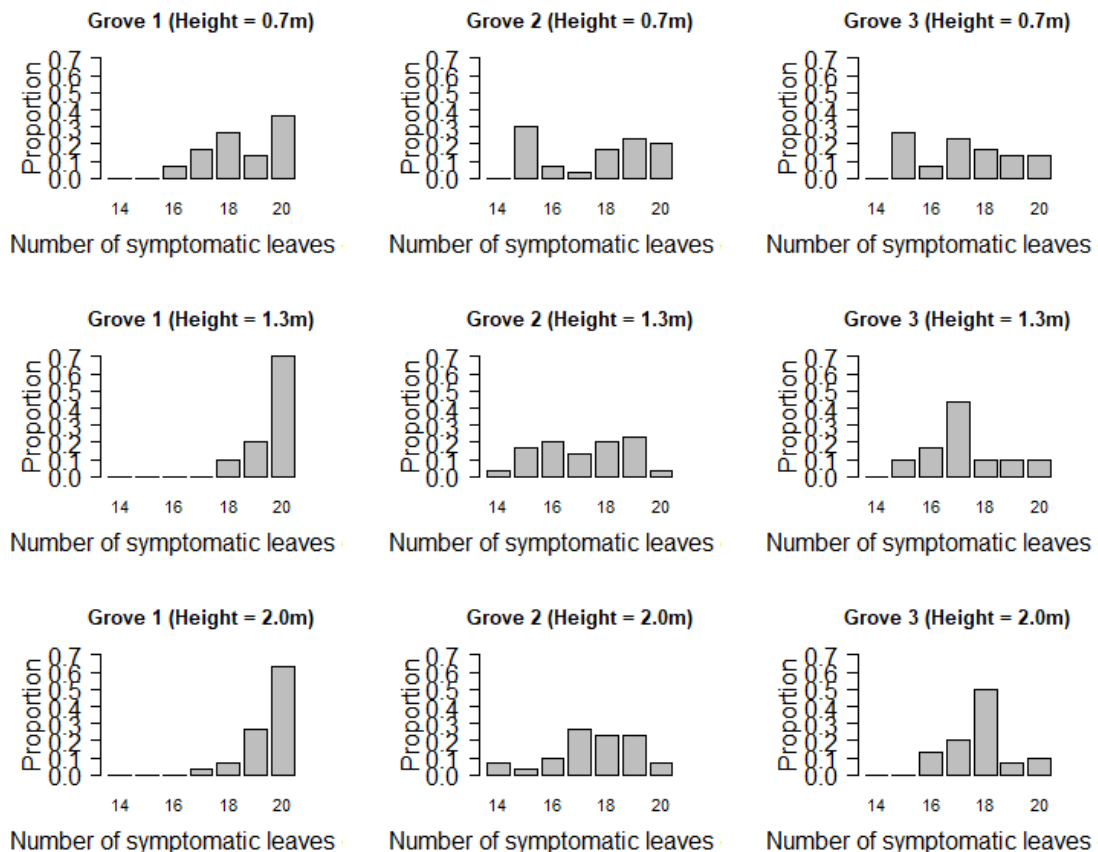

834

835

836 The mixed effect model we used to analyse these data uses a random effect for each plant to  
837 focus on the differences between disease severities on the same plant at different heights.

838

839 These are plotted overleaf; note that the histograms in rows two and three of the following  
840 figure plot out the differences on a plant-by-plant basis between the counts of infected leaves  
841 at H2 = 1.3m (row two) and H3 = 2.0m (row three) relative to H1 = 0.7m.

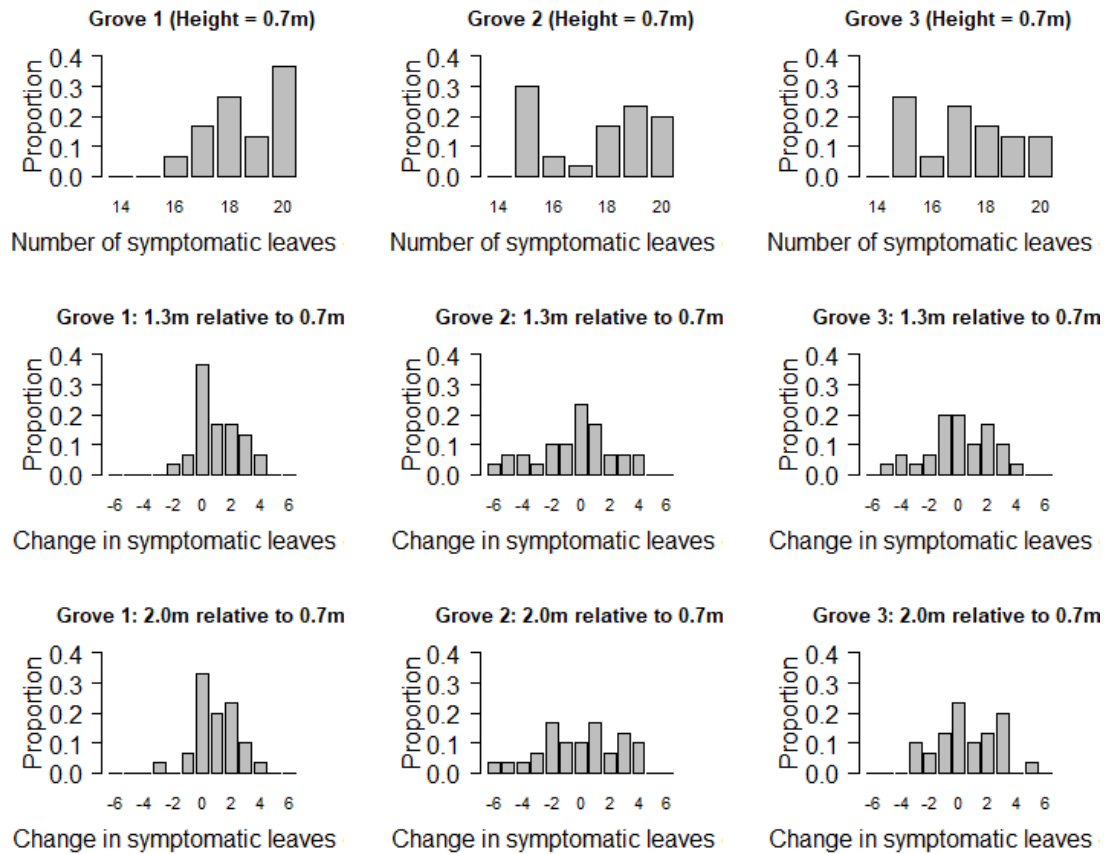

842  
843

844 The effect of plant height on disease severity appeared equivocal between the three groves we  
845 tested; there appears to be an increase in Grove 1, but no clear pattern in Groves 2 and 3. This  
846 preliminary visual conclusion was supported by our statistical modelling. We fitted a mixed  
847 effect logistic regression and found statistically support for an interaction between the two  
848 fixed effects Height and Grove (in a model with a random intercept for each Plant).

849  
850 `glmer(cbind(CountPlus,CountMinus) ~ Height + Grove + Height:Grove + (1 | Plant),`  
851 `family = binomial(link = "logit"), data = CGS_data)`

852  
853 The plot below shows the odds at different heights for different groves in this best-fitting  
854 model.

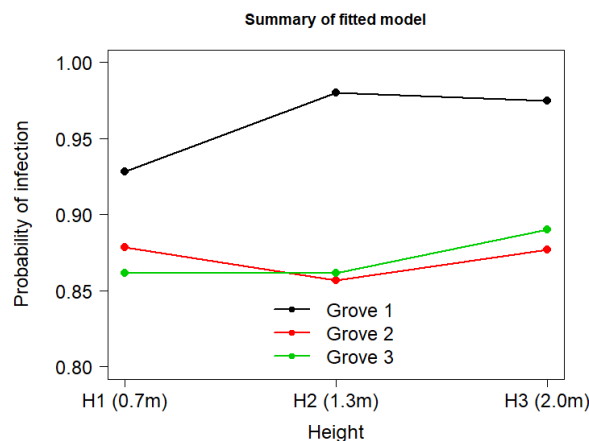

855
